1 Extracellular adenosine enhances the ability of PMNs to kill *Streptococcus*  
2 *pneumoniae* by inhibiting IL-10 production

3

4 Nalat Siwapornchai<sup>\*,†</sup>, James N. Lee<sup>\*,†</sup>, Essi Y. I. Tchalla<sup>‡</sup>, Manmeet Bhalla<sup>‡</sup>, Jun  
5 Hui Yeoh<sup>‡</sup>, John M. Leong<sup>†</sup> and Elsa N. Bou Ghanem<sup>‡</sup>

6

7 Author affiliations: <sup>†</sup>Department of Molecular Biology and Microbiology at Tufts  
8 University School of Medicine, Boston, MA 02111 USA

9 <sup>‡</sup>Department of Microbiology and Immunology, University at Buffalo School of  
10 Medicine, Buffalo, NY 14203, USA

11 \*These authors contributed equally to this work

12 Summary Sentence: Extracellular adenosine produced by CD73 promotes the  
13 ability of PMNs to kill *Streptococcus pneumoniae* by blunting IL-10 production

14 Running Title: PMN anti-bacterial phenotype requires CD73

15 Corresponding author information: Elsa N. Bou Ghanem, 955 Main Street,  
16 Buffalo, NY, 14203. Telephone: 716-829-2422. Email: [elsaboug@buffalo.edu](mailto:elsaboug@buffalo.edu)

17 Key Words: Neutrophil phenotype, CD73, anti-microbial, pneumonia, reactive  
18 oxygen species

19

20

21

22

23

24 **Abbreviations**

25 CFU: Colony Forming Units

26 CT: Cycle thresh-hold

27 EAD: Extracellular adenosine

28 I.P: Intra peritoneal

29 I.T: Intra tracheal

30 MFI (Mean Fluorescent Intensity)

31 MOI: Multiplicity of infection

32 MPO: Myeloperoxidase

33 NE: Neutrophil Elastase

34 OPH: Opsonophagocytic

35 PLY: Pneumolysin

36 PMA: Phorbol 12-myristate 13-acetate

37 PMNs: Polymorphonuclear leukocytes

38 Pneumococcus: *Streptococcus pneumoniae*

39 ROS: Reactive oxygen species

40 WT: Wild type

41

42

43

44

45

46

47 **Abstract**

48 PMNs are crucial for initial control of *Streptococcus pneumoniae*  
49 (pneumococcus) lung infection; however, as the infection progresses their  
50 persistence in the lungs is detrimental. We found that the progressive inability of  
51 PMNs to control infection correlated with phenotypic differences characterized by  
52 a decrease in CD73 expression, an enzyme required for production of  
53 extracellular adenosine (EAD). EAD production by CD73 was crucial for PMN  
54 function as PMNs from CD73<sup>-/-</sup> mice failed to kill pneumococci and  
55 supplementation with EAD reversed this defect. Further, adoptive transfer of  
56 PMNs from wild type mice prior to lung challenge was sufficient to boost the  
57 resistance of CD73<sup>-/-</sup> mice to infection. Importantly, CD73 activity was important  
58 for the antimicrobial function of PMNs from human donors. We found that CD73-  
59 mediated resistance is due to its inhibitory effects on IL-10. PMNs from CD73<sup>-/-</sup>,  
60 but not wild type mice, up-regulated IL-10 production upon pneumococcal  
61 infection in the lungs and *in vitro*. IL-10 inhibited PMN function, as addition of  
62 recombinant IL-10 impaired the ability of PMNs from wild type mice to kill  
63 pneumococci *ex vivo*, and treatment with anti-IL-10 boosted the bactericidal  
64 activity of CD73<sup>-/-</sup> PMNs. Blocking IL-10 also boosted the resistance of CD73<sup>-/-</sup>  
65 mice to pneumococcal pneumonia. CD73/IL-10 did not affect apoptosis, bacterial  
66 uptake and intracellular killing or production of anti-microbial Neutrophil Elastase  
67 and Myeloperoxidase. Rather, inhibition of IL-10 production by CD73 was  
68 important for production of extracellular ROS by PMNs upon *S. pneumoniae*

69 infection. This study demonstrates that CD73 regulates PMN anti-microbial  
70 phenotype during pneumococcal pneumonia.

71

## 72 **1. Introduction**

73 Neutrophils, also known as polymorphonuclear leukocytes or PMNs, play  
74 a major role in host defense against *S. pneumoniae* lung infection (1, 2). PMNs  
75 are required to control bacterial burden early in the infectious process. In mouse  
76 models, early PMN recruitment into the lungs within the first 12 hours following  
77 pneumococcal pulmonary infection coincided with a decrease in bacterial  
78 numbers and immunodepletion of PMNs prior to infection resulted in host lethality  
79 (3). *Ex vivo*, PMNs are thought to kill *S. pneumoniae* by engulfing the bacteria  
80 and producing serine proteases including cathepsin G (CG) and neutrophil  
81 elastase (NE) (4), which were also required for controlling bacterial numbers in  
82 murine models of pneumonia (5). Interestingly, later during infection, PMN  
83 persistence in the lungs promotes disease (3, 6, 7). In fact, we previously found  
84 that depletion of PMNs 18 hours after pneumococcal lung infection resulted in  
85 reduced bacterial numbers and enhanced mouse survival (3). These findings  
86 demonstrated that while PMNs are required at the start of infection, their  
87 persistence is detrimental for host survival. This also suggested that the  
88 antibacterial function of these innate immune cells and their ability to clear  
89 pneumococci is altered during the course of infection (3). However the  
90 mechanisms of this alteration in PMN phenotype remain unexplored.

91 A major regulator of host resistance to pneumococcal infection is

92 extracellular adenosine (EAD) (3). Upon damage due to a variety of insults  
93 including infection, ATP is thought to leak from damaged cells into the  
94 extracellular space and is converted into EAD by the sequential action of two  
95 exonucleosidases, CD39 and CD73 (8). EAD can then signal via four known  
96 receptors, i.e. A1, A2A, A2B and A3 (9). Several drugs targeting this pathway are  
97 in clinical studies or in use to treat a variety of inflammatory diseases (9), making  
98 it an attractive avenue for modulating immune responses during infection. We  
99 previously found that blocking EAD production by CD73 dramatically increased  
100 bacterial numbers in organs and resulted in host lethality upon *S. pneumoniae*  
101 lung infection in mice (3). EAD production by CD73 regulated PMN recruitment to  
102 the lungs and potentially boosted PMN function (3).

103 IL-10 is an anti-inflammatory cytokine associated with impaired control of  
104 pneumococcal pneumonia (10, 11). In mouse models, IL-10 levels increase in  
105 the lungs within 12 hours following pneumococcal challenge (10). Intranasal  
106 administration of IL-10 at the time of bacterial challenge results in decreased host  
107 survival and increased bacterial numbers in the lungs and blood, while blocking  
108 IL-10 prior to infection enhances bacterial clearance and boosts host survival  
109 (10). Interestingly, while IL-10<sup>-/-</sup> mice have reduced lung and systemic bacterial  
110 loads, these mice suffer increased mortality due to excessive pulmonary  
111 inflammation (12). IL-10 can be produced by many types of immune cells and it is  
112 now appreciated that murine PMNs can also produce this anti-inflammatory  
113 cytokine during infections (13-16). PMNs are a significant source of IL-10 in  
114 sepsis models (17) and stimulation with several bacterial pathogens, including

115 *Escherichia coli*, *Shigella flexneri* and mycobacterial BCG, triggers IL-10  
116 production by PMNs both *in vitro* and *in vivo* within 8 hours of infection (16).  
117 Parasitic infections such as *Leishmania major* (14) and *Trypanosoma cruzi* (15)  
118 also induce IL-10-producing PMNs during mouse infection. IL-10 production by  
119 PMNs may reduce their microbicidal capacity, as *in vitro* treatment of PMNs with  
120 IL-10 impairs their ability to phagocytose *Staphylococcus aureus*, *Candida*  
121 *albicans* and *E. coli* and blunts superoxide production (18, 19). Further, in a *S.*  
122 *aureus* burn infection model, a subset of IL-10 producing PMNs is associated  
123 with impaired host resistance to infection (13). It is not currently known if *S.*  
124 *pneumoniae* infection triggers IL-10 production by PMNs.

125 In this study, we explored the involvement of CD73 in the diminished  
126 efficacy of PMNs during the course of pneumococcal pneumonia. We found that  
127 during the course of lung infection, CD73 expression on PMNs decreased.  
128 Notably, this change in CD73 expression coincided with an increase in IL-10-  
129 producing PMNs, and we showed that CD73 suppressed IL-10 production by  
130 PMNs during infection and was required for the ability of these cells to kill *S.*  
131 *pneumoniae ex vivo*. This study identifies a role for CD73 in maintaining the  
132 antimicrobial phenotype of PMNs and elucidates the mechanisms by which CD73  
133 regulates PMN anti-microbial function and host resistance to pneumococcal  
134 pneumonia.

135

## 136 **2. Materials and Methods**

### 137 **2.1 Mice**

138 All experiments were conducted in accordance with Institutional Animal Care and  
139 Use Committee (IACUC) guidelines. Wild type (WT) C57BL/6 mice were  
140 purchased from Jackson Laboratories (Bar Harbor, ME). CD73<sup>-/-</sup> mice on  
141 C57BL/6 background were purchased from Jackson Laboratories and bred at a  
142 specific-pathogen free facility at Tufts University and The University at Buffalo.  
143 Female 8-12 week old mice were used in all experiments.

144

## 145 *2.2 Bacteria*

146 Wild type *S. pneumoniae* TIGR4 strain (serotype 4) and pneumolysin-deletion  
147 mutant ( $\Delta$ PLY) *S. pneumoniae* (20) were kind gifts from Andrew Camilli. Bacteria  
148 were grown at 37°C in 5% CO<sub>2</sub> in Todd-Hewitt broth supplemented with 0.5%  
149 yeast extract and oxyrase until culture reaches mid-exponential phase. Bacterial  
150 aliquots were frozen at -80°C in the growth media with 20% (v/v) glycerol. Prior to  
151 use, aliquots were thawed on ice, washed and suspended in PBS to obtain the  
152 appropriate concentration. The inoculums were then confirmed by serial dilution  
153 and dribble plating on Tryptic Soy Agar plates supplemented with 5% sheep  
154 blood agar.

155

## 156 *2.3 Isolation of PMNs*

157 Bone marrow cells were harvested from femurs and tibias of uninfected mice,  
158 flushed with RPMI 1640 supplemented with 10% FBS and 2 mM EDTA, and  
159 resuspended in PBS. Neutrophils were then separated from the rest of the bone  
160 marrow cells through density gradient centrifugation, using Histopaque 1119 and

161 Histopaque 1077 as previously described (21). The isolated neutrophils  
162 were resuspended in Hanks' Balanced Salt Solution (HBSS)/0.1% gelatin  
163 without  $\text{Ca}^{2+}$  and  $\text{Mg}^{2+}$ , and used in subsequent assays. The purity of neutrophils  
164 was also measured by flow cytometry using APC-conjugated anti-Ly6G and 85-  
165 90% of enriched cells were Ly6G+.

166

#### 167 *2.4 Opsonophagocytic killing assay*

168 The ability of PMNs to kill pneumococci was assessed *ex vivo* through an  
169 Opsonophagocytic (OPH) killing assay as previously described (3, 22). Briefly,  
170 100 $\mu\text{l}$  reactions in HBSS/0.1% gelatin consisted of  $1 \times 10^5$  PMNs incubated with  
171  $1 \times 10^3$  bacteria grown to mid log phase and pre-opsonized with 3% mouse sera.  
172 The reactions were incubated rotating for 45 minutes at 37°C. Where indicated,  
173 PMNs were incubated as indicated with adenosine (100 $\mu\text{M}$ ) or rIL-10 (50ng/mL)  
174 or anti-IL10 (1ug/mL JES5-2A5) or isotype control (1ug/mL) or 1x protease  
175 inhibitor cocktail for 30 minutes prior to adding pre-opsonized bacteria. HBSS  
176 with 3% sera was added to PMNs without treatment as the control. Percent killing  
177 was determined by dribble plating on blood agar plates and calculated in  
178 comparison to no PMN control under the exact same conditions (+/- treatments).

179

#### 180 *2.5 IL-10 Enzyme-Linked Immunosorbent Assay (ELISA)*

181  $1 \times 10^6$  Bone marrow PMNs were incubated with HBSS/0.1% gelatin or adenosine  
182 for 30 minutes, followed by 45 minutes infection at 37° C with pre-opsonized *S.*  
183 *pneumoniae* TIGR4 at an MOI of 2 or mock treated with HBSS and sera only



184 (uninfected). The reactions were spun down and the supernatants were obtained  
185 to measure IL-10 production using Mouse IL-10 ELISA kit (e-bioscience)  
186 according to manufacturer's instructions.

187

## 188 2.6 ROS Assay

189 Following isolation from the bone marrow, PMNs were re-suspended in HBSS  
190 ( $\text{Ca}^{2+}$  and  $\text{Mg}^{2+}$  free) and acclimated at room temperature for one hour. The cells  
191 were then spun down and re-suspended in KRP buffer (Phosphate buffered  
192 saline with 5mM glucose, 1mM  $\text{CaCl}_2$  and 1mM  $\text{MgSO}_4$ ) and equilibrated at room  
193 temperature for 30 minutes. The cells were then seeded in 96-well white  
194 LUMITRAC™ plates (Greiner Bio-One) at  $5 \times 10^5$  PMNs per well, treated with anti-  
195 IL-10 or rIL-10 for 30 minutes at  $37^\circ \text{C}$ . For detection of extracellular ROS,  $50 \mu\text{M}$   
196 Isoluminol (Sigma) plus 10U/ml HRP (Sigma) were added, while for detection of  
197 intracellular ROS,  $50 \mu\text{M}$  Luminol (Sigma) was added to the wells as previously  
198 described (23-26). The cells were infected with pre-opsonized *S. pneumoniae*  
199 TIGR4 at an MOI of 2 or mock treated with buffer containing 3% mouse sera  
200 (uninfected). PMNs treated with 100 nM Phorbol 12-myristate 13-acetate (PMA)  
201 (Sigma) were used as a positive control. Luminescence was immediately read  
202 (following infection) over a period of one hour at  $37^\circ \text{C}$  in a pre-warmed Biotek  
203 Plate reader. Wells containing buffer and Isoluminol plus HRP or Luminol alone  
204 were used as blanks.

205

## 206 2.7 Animal infections and scoring

207 Mice were lightly anesthetized with isoflurane and challenged intra-tracheally (i.t.)  
208 with  $5 \times 10^5$  colony-forming units (CFU) of WT *S. pneumoniae* TIGR4 strain by  
209 instilling 50  $\mu$ l of bacteria directly into the trachea with the tongue pulled out to  
210 facilitate delivery of bacteria directly into the lungs (3). Following the infection,  
211 mice were monitored daily for weight loss and blindly scored for signs of sickness  
212 including weight loss, activity level, posture and breathing, scored as healthy [0]  
213 to severely sick [21] as previously described (27). The lung and brain were  
214 harvested and homogenized in sterile PBS. Blood was collected to follow  
215 bacteremia. Each sample was diluted in sterile PBS and dribble plated on blood  
216 agar plates to enumerate bacterial numbers.

217

### 218 *2.8 Isolation of cells from the lungs and flow cytometry*

219 Mice were perfused with 10ml PBS, the lungs removed, washed in PBS, and  
220 minced into small pieces. The lungs were then digested for 1 hour with RPMI  
221 1640 supplemented with 10% FBS, 1 mg/ml Type II collagenase (Worthington),  
222 and 50 U/ml Deoxyribonuclease I (Worthington) at 37° C/ 5% CO<sub>2</sub>. Single-cell  
223 suspensions were obtained by mashing the digested lungs, and the red blood  
224 cells were removed by treatment with a hypotonic lysis buffer (Lonza). Cells were  
225 analyzed using flow cytometry. Intracellular cytokine staining (ICS) was  
226 performed using the Cytotfix/Cytoperm kit (BD Biosciences). GolgiPlug was  
227 added to the digestion media and following red blood cell lysis, the cells were  
228 incubated with RPMI 1640 supplemented with 10% FBS and Golgi Plug for 3  
229 more hours at 37° C/ 5% CO<sub>2</sub>. Cells were surface stained with anti-mouse CD45

230 (clone 30-F11, e-Bioscience), Ly6G (clone 1A8, BD Biosciences) and CD73  
231 (Clone TY/11.8, e-Bioscience). For intracellular staining, cells were  
232 permeabilized and stained with IL-10 (clone JES5-16E3, e-Bioscience) or isotype  
233 control (Rat IgG2b K Isotype Control, Biolegend). Fluorescence intensities were  
234 measured on a FACSCalibur and at least 25,000 events for lung tissue were  
235 analyzed using FlowJo.

236

### 237 *2.9 Adoptive transfer of PMNs*

238 Bone marrow PMNs were isolated from uninfected mice using density gradient  
239 centrifugation as described above and resuspended in PBS. Mice either received  
240  $2.5 \times 10^6$  cells via intraperitoneal (i.p.) injection or mock-treated (PBS). One hour  
241 post transfer, mice were challenged i.t. with  $5 \times 10^5$  CFU of *S. pneumoniae*. Mice  
242 were euthanized at 24 hours post infection, and the lungs, brain, and blood were  
243 collected and plated on blood agar plates for CFU.

244

### 245 *2.10 Blocking IL-10 in vivo*

246 Mice were treated with 0.1mg/mouse of IL-10 blocking antibody (JES52A5,  
247 Biolegend) or the isotype control (Rat IgG1 K Isotype Control, Biolegend) through  
248 i.p. injection. After 2 hours, mice were then challenged i.t. with  $5 \times 10^5$  CFU of *S.*  
249 *pneumoniae*. The lungs and blood were collected two days post-infection to  
250 determine bacterial burden.

251

### 252 *2.11 Assays with human PMNs*

253 Young (23-38 years old), male and female healthy human volunteers were  
254 recruited in accordance with The University at Buffalo Human Investigation  
255 Review Board (IRB) and signed informed consent forms. Individuals taking  
256 medication, reporting symptoms of infection within the last 2 weeks or that were  
257 pregnant were excluded from the study. Whole blood was obtained using acid  
258 citrate/dextrose as an anti-coagulant. PMNs were isolated using a 2% gelatin  
259 sedimentation technique as previously described (28) which allows for isolation  
260 of active PMNs with ~90% purity.  $5 \times 10^5$  PMNs were treated with the selective  
261 and competitive inhibitor of CD73,  $\alpha, \beta$  methylene ADP (1 or  $10 \mu\text{M}$ ) or DMSO  
262 vehicle control for 30 minutes at  $37^\circ \text{C}$ . The PMNs were then infected with  $10^3$   
263 CFU *S. pneumoniae* pre-opsonized in 10% (v/v) baby rabbit serum (Pel-Freeze)  
264 for 45 minutes at  $37^\circ \text{C}$  with rotation. Samples were then placed on ice to stop the  
265 process of opsonophagocytosis followed by serial dilution and plating on blood  
266 agar plates to enumerate viable CFU. The percentage of bacterial killing was  
267 calculated relative to no PMN controls incubated under the same treatment  
268 conditions.

269

#### 270 *2.12 mRNA measurement*

271 RNA was extracted from  $2 \times 10^6$  human PMNs using the RNeasy Mini Kit (Qiagen)  
272 as per manufacturer's protocol. TURBO DNA-free kit (Invitrogen) was used to  
273 digest DNA from the RNA samples prior conversion into cDNA. RNA  
274 concentration and 260/280 ratio were determined using Nano-drop (Thermo  
275 Fischer Scientific). For each sample, 500ng of RNA was converted into cDNA

276 using SuperScript VILO™ cDNA synthesis kit (Life Technologies) according to  
277 the manufacturer's protocol. RT-PCR was performed using CFX96 Touch™  
278 Real-Time PCR Detection System from Bio-Rad and CT (cycle thresh-hold)  
279 values were determined using the following TaqMan probes from Life  
280 Technologies (Thermo Fischer Scientific): GAPDH (human Hs99999905\_m1)  
281 CD73 (human Hs00159686\_m1) and IL-10 (human Hs00961622\_m1). Each  
282 sample was run in duplicates. Data were analyzed by the comparative threshold  
283 cycle ( $2^{-\Delta CT}$ ) method, normalizing the CT values obtained for CD73 and IL-10  
284 expression to those for GAPDH of the same sample. For comparison of IL-10  
285 levels upon infection, relative quantity of transcripts (RQ) values were calculated  
286 by the  $\Delta\Delta CT$  method by using the formula  $RQ = 2^{-\Delta\Delta CT}$  (29). The  $\Delta\Delta CT$   
287 values were obtained by subtracting  $\Delta CT$  value of the infected (test) from that of  
288 the uninfected control.

289

### 290 *2.13 Statistics*

291 All statistical analysis was performed using Prism7 (Graph Pad). CFU data were  
292 log-transformed to normalize distribution. For all graphs, the mean values +/- SD  
293 are shown. Significant differences were determined by 2-way ANOVA followed  
294 by Sidak's multiple comparisons test or Student's t-test where  $p$  values less than  
295 0.05 were considered significant (as indicated by asterisks). Pearson test was  
296 used to determine correlation.

297

### 298 **Online Supplemental Material**

299 *Adenosine measurement*

300 Blood was collected from mice by venipuncture in microtainer tubes. The tubes  
301 were centrifuged at 9000rpm for 2 minutes and the sera obtained. Adenosine  
302 level in the sera was measured using the Adenosine Assay Fluorometric Kit  
303 (BioVision) as per manufacturer's instructions.

304

305 *Bacterial uptake and intracellular killing assay*

306 To determine uptake/phagocytosis and intracellular killing by PMNs, we  
307 performed Gentamicin-protection assay. Isolated PMNs from uninfected mice  
308 were incubated with pre-opsonized wild type or  $\Delta$ PLY *S. pneumoniae* (MOI=2) for  
309 10 minutes at 37°C. Gentamycin (100ug/ml) was then added for 40 minutes to kill  
310 extracellular bacteria. The reactions were washed three times with HBSS and  
311 resuspended in 100ul HBSS/0.1% gelatin. To measure initial bacterial uptake,  
312 the reactions were diluted and plated on blood agar plates and the percentage of  
313 the input inoculum that was engulfed was calculated. To determine intracellular  
314 killing, the reactions were returned to 37°C and incubated for 30 minutes and 90  
315 minutes. The reactions were diluted and plated on blood agar plates and the  
316 percentage of the engulfed inoculum (at 10 minutes) that was killed was then  
317 calculated.

318

319 *Neutrophil Elastase and Cathepsin G activity assay*

320  $1 \times 10^6$  Bone marrow PMNs were treated with adenosine, anti-IL-10 or rIL-10 or  
321 mock treated with HBSS/0.1% gelatin for 30 minutes at 37° C. The PMNs were

322 then infected with pre-opsonized *S. pneumoniae* TIGR4 at an MOI of 2 or mock  
323 treated with buffer containing 3% mouse sera (uninfected) for 45 minutes at 37°  
324 C. The reactions were spun down and the supernatants were used to measure  
325 neutrophil elastase and cathepsin G activities with the Neutrophil Elastase  
326 Activity Assay Kit Fluorometric (Abcam) and the Cathepsin G Activity Assay Kit  
327 (Abcam) respectively (28).

328

### 329 *Apoptosis Assay*

330 PMNs were pre-treated with buffer or incubated with anti-IL-10 or rIL-10 for 30  
331 minutes at 37° C then infected with pre-opsonized *S. pneumoniae* TIGR4 at an  
332 MOI of 2 or mock treated with buffer containing 3% mouse sera (uninfected) for  
333 45 minutes at 37° C. The percentage of apoptotic cells were then determined by  
334 flow cytometry using the FITC Annexin V apoptosis detection kit with PI  
335 (BioLegend) following manufacturer's instructions.

336

### 337 *Myeloperoxidase (MPO) levels*

338  $1 \times 10^6$  Bone marrow PMNs were treated with anti-IL-10 or rIL-10 or mock treated  
339 with HBSS/0.1% gelatin for 30 minutes at 37° C. The PMNs were then infected  
340 with pre-opsonized *S. pneumoniae* TIGR4 at an MOI of 2 or mock treated with  
341 buffer containing 3% mouse sera (uninfected) for 30 minutes at 37° C. The cells  
342 were lysed with lysis buffer containing 0.1% Triton-X and MPO levels measured  
343 by ELISA (Invitrogen) according to manufacturer's instructions.

344

### 345 **3. Results**

#### 346 **3.1 CD73 expression on PMNs decreases over the course of infection**

347 We previously found that PMNs are required for protection at the  
348 beginning of *S. pneumoniae* lung infection (3), but are detrimental at later times.  
349 To test if there was a correlation between PMN numbers in the lungs and  
350 bacterial burden, we infected young C57BL/6 mice intra-tracheally (i.t.) with  
351  $5 \times 10^5$  colony-forming units (CFU) of *S. pneumoniae* TIGR4 strain and monitored  
352 bacterial burden and pulmonary influx of PMNs over the first 72 hours. We then  
353 performed correlation analysis between PMN number and lung CFU for 0-12  
354 hours vs. 18-72 hours following infection. We found that PMN influx into the lungs  
355 strongly correlated with a decrease in bacterial burden for the first 12 hours  
356 following infection (Fig 1A left panel, R-squared = 0.71,  $p=0.0001$ ). However,  
357 there was no correlation between PMN presence in the lungs and bacterial  
358 numbers for the remainder of the infection (Fig 1A right panel) suggesting that  
359 PMNs are no longer able to control the infection.

360 To determine if this was associated with a difference in the phenotype of  
361 pulmonary PMNs over time, we monitored the expression of the EAD-producing  
362 enzyme CD73 on PMNs in the lungs for 72 hours following lung challenge. We  
363 found that in the first 18 hours of infection, the majority (~75-80%) of PMNs in the  
364 lungs expressed CD73 (Fig. 1B). However, both the percentage of PMNs  
365 expressing CD73 and the amount (measured by the mean fluorescent intensity  
366 or MFI) of CD73 expressed on PMNs in the lungs significantly dropped over the  
367 course of infection. CD73 expression had dropped to half by 72 hours and the



368 drop started to occur after 12 hours post-infection, a time point after which PMN  
369 presence in the lungs no longer correlated with control of bacterial numbers (Fig  
370 1A) (3). The decrease of CD73 expression also occurred on circulating PMNs  
371 and bone marrow PMNs (Fig. 1C), suggesting that this was a systemic decrease  
372 and not only localized in the lungs. A recent study identified a population of  
373 PMNs in the spleen with intermediate expression of Ly6G on their surface that  
374 exhibited a lowered ability to engulf *S. pneumoniae* during i.v. infection (30).  
375 When we compared Ly6G expression, we found that CD73 positive pulmonary  
376 PMNs had significantly higher expression of Ly6G (MFI) on their surface at all the  
377 time points tested (Fig. 1D). These data show that there are changes in PMNs  
378 over the course of pneumococcal pneumonia and that low CD73 expression on  
379 PMNs may be indicative of a PMN subset that is associated with lower anti-  
380 microbial activity.

381

### 382 **3.2 CD73 and extracellular adenosine are required for the ability of PMNs to** 383 **kill *S. pneumoniae***

384 Prior studies demonstrated that EAD is required for protection against *S.*  
385 *pneumoniae* lung infection (3). To test if EAD production has a role in anti-  
386 pneumococcal function of PMNs, we compared *ex vivo* opsonophagocytic killing  
387 of pneumococci by PMNs isolated from the bone marrow of *CD73*<sup>-/-</sup> or wild type  
388 C57BL/6 (WT) mice. Strikingly, *CD73*<sup>-/-</sup> PMNs completely failed to kill *S.*  
389 *pneumoniae* and in fact the presence of these PMNs promoted an increase in  
390 bacterial numbers as indicated by negative bacterial killing on the graph (Fig. 2).

391 To test if the inability of *CD73*<sup>-/-</sup> PMNs to kill bacteria was due to a defect in EAD  
392 production, we added back adenosine to the opsonophagocytic reactions. Upon  
393 infection, adenosine levels in the sera of WT mice varied considerably, but on  
394 average significantly increased five-fold to 52.6 +/- 29.0 μM as measured by a  
395 fluorometric kit (Fig S 1A). We found that supplementing *CD73*<sup>-/-</sup> PMNs with EAD  
396 at 100 μM (closer to the higher levels found in infected mice) restored the ability  
397 of these cells to kill bacteria back to levels comparable with WT PMNs. The  
398 difference in bacterial killing observed was not due to difference in bacterial  
399 survival in WT versus *CD73*<sup>-/-</sup> sera or direct toxic effects of EAD on bacterial  
400 viability (Fig. S1B and C). Also, addition of EAD had no significant effect on  
401 bacterial killing by WT PMNs (Fig 2).

402 To test the clinical relevance of our findings, we tested the effect of CD73  
403 inhibition on the anti-bacterial activity of PMNs from human donors. PMNs were  
404 isolated from the blood of young healthy donors and treated with the selective  
405 and competitive inhibitor of CD73, α,β methylene ADP or vehicle control *in vitro*  
406 and their ability to kill pneumococci was assessed. We found that in over half (i.e.  
407 4 out of 7) of the donors tested, CD73 inhibition completely abrogated the ability  
408 of PMNs to kill pneumococci and in fact promoted bacterial growth in the  
409 presence of PMNs instead (Fig. 3A). The inhibitor had no direct effect on the  
410 viability of *S. pneumoniae* (data not shown) as previously described (3). CD73  
411 mRNA was detected in all five donors we tested (Fig. 3B) and relative expression  
412 did not correlate with the responsiveness of donor PMNs to CD73 inhibition.

413 These findings demonstrate that production of EAD by CD73 is required for the  
414 ability of PMNs to kill pneumococci.

415

### 416 **3.3 Adoptive transfer of PMNs from wild type mice boosts resistance of** 417 **CD73<sup>-/-</sup> mice to *S. pneumoniae***

418 To test the role of EAD production by PMNs *in vivo*, we adoptively  
419 transferred 2.5x10<sup>6</sup> PMNs isolated from WT or CD73<sup>-/-</sup> mice into CD73<sup>-/-</sup> mice,  
420 one hour later infected the mice with 5x10<sup>5</sup> CFU of *S. pneumoniae* i.t. and then  
421 compared bacterial burdens in the lung, blood and brain at 24 hours post  
422 infection. We found that although transfer of WT PMNs had no impact on  
423 bacterial numbers in the lungs (Fig. 4A), it significantly reduced the systemic  
424 spread of pneumococci and resulted in a 50 and 5-fold reduction in blood and  
425 brain bacterial loads respectively (Fig. 4B and C) when compared to no transfer  
426 controls. Surprisingly, we found that adoptive transfer of CD73<sup>-/-</sup> PMNs worsened  
427 susceptibility to infection and resulted in a significant ~10-fold increase in  
428 bacterial numbers in all sites (lung, blood, brain) tested (Fig. 4A-C) when  
429 compared to no transfer controls. This was consistent with our *in vitro* findings  
430 where bacterial numbers increased in the presence of CD73<sup>-/-</sup> PMNs. These  
431 findings suggest that EAD production by PMNs is required and sufficient to  
432 promote resistance to *S. pneumoniae* infection.

433

### 434 **3.4 Bacterial uptake and intracellular killing by PMNs are not altered by** 435 **CD73 and EAD**

436 We next wanted to identify how CD73 and adenosine were regulating the  
437 ability of PMNs to kill *S. pneumoniae*. Pneumococcal killing by PMNs was  
438 previously shown to depend on uptake and serine proteases (4, 5). To test if  
439 EAD production was affecting bacterial phagocytosis, we used a gentamicin-  
440 protection assay where gentamicin was added following PMN incubation with  
441 pre-opsonized pneumococci to kill any extracellular bacteria. A potentially  
442 confounding factor is that wild type *S. pneumoniae* produce pneumolysin (PLY),  
443 which creates pores in the mammalian cell membranes and may allow  
444 gentamicin to enter the host cell and kill intracellular bacteria. In fact, a PLY-  
445 deletion mutant demonstrated 2-fold greater gentamicin protection than wild type  
446 *S. pneumoniae* (Fig. S2A). This was not due to difference in sensitivity to  
447 gentamicin (Fig. S2B) or susceptibility to overall opsonophagocytic killing by  
448 PMNs (Fig. S2C) which is consistent with previous reports that PLY has no  
449 significant role in bacterial killing by PMNs (31). These data suggest that using  
450 gentamicin protection assays to determine intracellular entry/growth of bacteria  
451 such as *S. pneumoniae* that produce pore forming toxins may underestimate the  
452 true numbers of intracellular bacteria.

453 We proceeded with using *S. pneumoniae*  $\Delta$ PLY to compare phagocytosis  
454 between WT and CD73<sup>-/-</sup> PMNs. To differentiate uptake from intracellular killing,  
455 we looked at an early time point 10 minutes post infection, and found no  
456 significant difference in the percentage of engulfed bacteria between the different  
457 mouse strains (Fig. S2D). We also found that the engulfed bacteria were very  
458 efficiently killed by both WT and CD73<sup>-/-</sup> PMNs (Fig. S2E) with 50% and 100% of

459 the engulfed inoculum being killed at 30 and 90 minutes post-uptake  
460 respectively. These findings suggest that CD73/EAD does not affect bacterial  
461 uptake or intracellular killing by PMNs.

462

### 463 **3.5 Neutrophil Elastase levels are not altered by CD73 and EAD**

464 Serine protease such as cathepsin G (CG) and neutrophil elastase (NE)  
465 were shown to be essential for the ability of PMNs to kill *S. pneumoniae* (4, 5).  
466 We therefore measured if CD73 and EAD altered the activities of serine  
467 proteases Cathepsin G and NE. We were unable to detect Cathepsin G  
468 enzymatic activity either at baseline or upon pneumococcal infection in any of the  
469 samples we collected. NE activity was easily detected, however, we found no  
470 significant difference in NE activity between WT and CD73<sup>-/-</sup> PMNs at baseline or  
471 upon infection. Further, addition of adenosine did not alter this response (Fig  
472 S3A). To test if neutrophil proteases were important for the ability of adenosine to  
473 rescue CD73<sup>-/-</sup> PMN function, we used a protease inhibitor cocktail to inhibit  
474 protease activity. Consistent with previous reports, inhibition of neutrophil  
475 proteases completely abrogated the ability of WT PMNs to kill bacteria (Fig. S3B)  
476 and also prevented the ability of EAD to boost CD73<sup>-/-</sup> PMN function. These  
477 findings show that functional protease activity is important for the ability of EAD  
478 to boost PMN anti-pneumococcal function, however, CD73 and EAD had no  
479 effect on the activity of NE, a major granular component and serine protease  
480 important for killing pneumococci (4, 5, 32).

481

482 **3.6 Extracellular adenosine dampens IL-10 production from PMNs following**  
483 **infection**

484 EAD was previously shown to play a role in regulating production of  
485 cytokines by immune cells (33) including IL-10 by macrophages (34-36), an anti-  
486 inflammatory cytokine whose production early on during pneumococcal infection  
487 was reported to be detrimental for host resistance (10). To test whether EAD was  
488 targeting IL-10, we compared IL-10 production by WT and CD73<sup>-/-</sup> PMNs at  
489 baseline and upon *ex vivo* infection with *S. pneumoniae*. We found that at  
490 baseline, there was no significant difference in IL-10, however, upon infection,  
491 CD73<sup>-/-</sup> PMNs produced significantly more IL-10 as compared to WT PMNs (Fig.  
492 5A). Further, while WT PMNs did not upregulate IL-10 production upon  
493 pneumococcal infection, CD73<sup>-/-</sup> PMNs displayed a ~ 2.5-fold increase in IL-10  
494 above resting baseline levels (Fig 5A and B) and this upregulation was  
495 significantly blunted (Fig. 5B) upon exposure to EAD. When we examined PMNs  
496 isolated from three human donors, we could not detect any upregulation in IL-10  
497 mRNA in response to *S. pneumoniae* infection (data not shown). These findings  
498 show that, in contrast to wild type PMNs, CD73-deficient PMNs produce IL-10 in  
499 response to *S. pneumoniae*, and that the induction of IL-10 production upon  
500 infection can be blocked by EAD.

501

502 **3.8 IL-10 impairs the ability of PMNs to kill *S. pneumoniae***

503 Although the role of IL-10 during *S. pneumoniae* infection in mice is well  
504 established (10-12, 37), its effect on PMN anti-pneumococcal function has not

505 been elucidated. To test that, WT PMNs were treated with either recombinant IL-  
506 10 or IL-10 blocking antibody and their ability to kill pneumococci measured in  
507 our opsonophagocytic assay. We found that addition of IL-10 abrogated the  
508 ability of WT PMNs to kill pneumococci while blocking this cytokine boosted the  
509 anti-bacterial efficiency of PMNs (Fig 6).

510 To test whether the anti-bacterial activity of CD73<sup>-/-</sup> PMNs can be rescued  
511 by targeting IL-10 we treated the PMNs with the IL-10 blocking antibody and  
512 performed the opsonophagocytic assay. We found that blocking IL-10 restored  
513 the pneumococcal killing ability of CD73<sup>-/-</sup> PMNs to WT levels (Fig 6). To test if  
514 the ability of adenosine to rescue CD73<sup>-/-</sup> PMN function was dependent on  
515 blunting IL-10, we added recombinant IL-10 to CD73<sup>-/-</sup> PMNs supplemented with  
516 adenosine. We found that the addition of recombinant IL-10 had no discernable  
517 effect on bacterial killing by CD73<sup>-/-</sup> PMNs, consistent with the (already high)  
518 levels of IL-10 produced by these cells (Fig. 6). In addition, the addition of IL-10  
519 prevented the ability of adenosine to boost the anti-microbial function of these  
520 cells (Fig 6). These findings demonstrate that EAD's ability to blunt IL-10  
521 production is crucial for the anti-pneumococcal function of PMNs.

522

### 523 **3.9 IL-10 has no effect on PMN viability, bacterial association or NE** 524 **production**

525 We wanted to start exploring potential mechanisms by which IL-10  
526 inhibition by CD73 regulates PMN function. It was previously reported that IL-10  
527 producing PMNs were apoptotic (38). Since cellular death pathways including

528 apoptosis and necrosis are known to play a role in the anti-bacterial function of  
529 PMNs (39), we compared the percentage of apoptotic and necrotic cells using  
530 Annexin V and propidium iodide staining and flow cytometry. We found that as  
531 expected (40), pneumococcal infection induced pore formation and necrosis of  
532 PMNs (PI and Annexin V double positive cells) (Fig S4A). However, there was no  
533 difference in viability of PMNs at baseline or upon infection between WT and  
534 CD73<sup>-/-</sup> PMNs and addition or inhibition of IL-10 did not further alter the  
535 percentage of necrotic PMNs (Fig S4A). We also tested the effect of IL-10 on the  
536 association of PMNs with GFP-labeled pneumococci and found that neither  
537 addition nor blocking of IL-10 altered association (data not shown). When we  
538 examined the effect of IL-10 on NE activity, we found that neither addition of  
539 recombinant IL-10 nor blocking IL-10 significantly altered the activity of the  
540 enzyme by PMNs (Fig S3A).

541

### 542 **3.10 CD73 and IL-10 regulate extracellular ROS production by PMNs upon** 543 ***S. pneumoniae* infection**

544 IL-10 was reported to down regulate reactive oxygen species (ROS)  
545 production by PMNs (18). To determine whether the CD73/IL-10 axis regulated  
546 ROS production upon pneumococcal infection, we first compared production of  
547 both intracellular and extracellular ROS by WT and CD73<sup>-/-</sup> PMNs. When we  
548 measured intracellular ROS production over time, we found that the infection up  
549 regulated ROS production rapidly within minutes to more than 50-fold increase  
550 around the peak of the response at the 25 minute mark in both strains of mice



551 (Fig. 7A). There was no significant difference in intracellular ROS production by  
552 WT vs CD73<sup>-/-</sup> PMNs in response to pneumococcal infection, consistent with our  
553 findings that bacterial uptake and intracellular killing was not affected by CD73.

554 When we examined production of extracellular ROS in uninfected PMNs,  
555 no ROS production was observed (Fig. 7B). However, upon exposure to  
556 pneumococci, ROS production was rapidly induced by PMNs from both strains of  
557 mice. This response was immediate and peaked within the first five minutes of  
558 infection and waned over time (Fig. 7B) as previously described (23). Importantly,  
559 during the first 10 minutes, PMNs from B6 mice produced significantly higher  
560 levels of extracellular ROS than CD73<sup>-/-</sup> PMNs, producing 3-fold higher levels of  
561 ROS at the peak of the response (Fig. 7B at the 5 minute mark). Intriguingly,  
562 extracellular ROS production by PMNs in response to the positive control PMA  
563 was not different between mouse strains (Fig. S4B), indicating that the blunted  
564 response observed in CD73<sup>-/-</sup> PMNs was not due to a general defect in ROS  
565 production, but rather was specific to pneumococcal infection.

566 To determine if IL-10 had a role in production of extracellular ROS by  
567 PMNs, we added recombinant IL-10 to B6 PMNs and found that this cytokine  
568 significantly blunted the magnitude of the response during pneumococcal  
569 infection, which is consistent with its reported anti-inflammatory role (18) (Fig.  
570 7C). Next we tested whether the extracellular ROS response of CD73<sup>-/-</sup> PMNs  
571 upon infection can be rescued by treating the PMNs with the IL-10 blocking  
572 antibody. We found that blocking IL-10 significantly boosted extracellular ROS  
573 production in infected CD73<sup>-/-</sup> PMNs, resulting in around a 2-fold increase at the

574 peak of the response at 5 minutes post infection (Fig. 7D). Taken together, these  
575 data demonstrate that inhibition of IL-10 production by CD73 is important for an  
576 optimal extracellular ROS response by PMNs during *S. pneumoniae* infection.

577 The enzyme myeloperoxidase (MPO) was reported to play a crucial role in  
578 clearance of *S. pneumoniae* and that it exerted its function partially by facilitating  
579 ROS production (41). Therefore we compared the effect of IL-10 and CD73 on  
580 MPO production by PMNs. We found that pneumococcal infection significantly up  
581 regulated MPO levels (Fig S4C) as previously reported (41). However, there was  
582 no difference in the levels of the enzyme between WT and CD73<sup>-/-</sup> PMNs, nor  
583 was its levels altered by blocking or adding IL-10 (Fig S4C). This suggests that  
584 the effect of IL-10 and EAD on extracellular ROS production by PMNs upon  
585 pneumococcal infection is not mediated via MPO.

586

### 587 **3.11 Pulmonary PMNs from CD73<sup>-/-</sup> mice produce IL-10 early on during *S.*** 588 ***pneumoniae* infection**

589 Next, we wanted to test the relevance of our findings *in vivo* and assess  
590 IL-10 production during lung infection. WT C57BL/6 and CD73<sup>-/-</sup> mice were  
591 infected i.t. with 5x10<sup>5</sup> CFU of *S. pneumoniae* TIGR4 and IL-10 production by  
592 pulmonary PMNs was monitored at 6 hours post infection by intracellular  
593 cytokine staining. We focused on early time points since that is when PMNs are  
594 most relevant for the control of bacterial numbers. When we gated on PMNs  
595 (Ly6G+; see Fig. S5 for the gating strategy), we found that a low percentage  
596 (~6%) of PMNs in the lungs of WT mice expressed IL-10 and similar to our

597 observations *ex vivo*, there was no increase in IL-10 production upon infection  
598 (Fig. 8A and B). However, we observed a significant increase in IL-10 production  
599 by pulmonary PMNs in CD73<sup>-/-</sup> mice where the percentage of IL-10 producing  
600 PMNs increased from 5% at baseline to 20% (Fig. 8A) and the amount of IL-10  
601 produced (measured by MFI) increased approximately 1.5-fold (Fig. 8B) at 6  
602 hours post-infection. When we compared the number of PMNs producing IL-10,  
603 we found that in CD73<sup>-/-</sup> mice, there is a significant increase in IL-10 producing  
604 PMNs above baseline by 6 hours post-infection. In contrast, in WT mice, we did  
605 not observe an increase in PMNs until 18 hours following infection. Further, as  
606 compared to WT, CD73<sup>-/-</sup> mice had 6-fold and 2-fold more PMNs making IL-10 at  
607 6 and 18 hours after lung challenge, respectively. When we measured total IL-10  
608 production in the lungs at 6 hours following infection, we found that CD73<sup>-/-</sup> mice  
609 had on average more IL-10 (231.9 +/-20.51 pg/ml) as compared to WT mice (190  
610 +/- 86.65 pg/ml), but the difference did not reach statistical significance. These  
611 findings show that upon lung infection, in the absence of CD73, IL-10 production  
612 by pulmonary PMNs is higher and occurs more rapidly.

613

### 614 **3.12 Blocking IL-10 pre-infection partially rescues the susceptibility of** 615 **CD73<sup>-/-</sup> mice to pneumococcal lung infection**

616 To test whether the early increase in IL-10 production by PMNs in CD73<sup>-/-</sup>  
617 mice contribute to their susceptibility to infection, we treated the mice with either  
618 isotype control or the IL-10 blocking antibody 2 hours prior to infection. Mice were  
619 then challenged i.t. with 5x10<sup>5</sup> CFU of *S. pneumoniae*, and bacterial burdens in

620 the lung and blood were determined two days post-infection. Blocking IL-10 prior  
621 to infection significantly boosted the resistance of CD73<sup>-/-</sup> mice resulting in a 20  
622 and 24-fold reduction in bacterial numbers in the lung and blood respectively as  
623 compared to isotype treated controls and rendering bacterial burdens in these  
624 mice indistinguishable from those of WT mice (Fig 9). Our data suggest that the  
625 increased susceptibility of CD73<sup>-/-</sup> mice during pneumococcal infection is at least  
626 in part mediated by IL-10.

627

#### 628 **4. Discussion**

629 There is mounting evidence that PMNs are plastic and display phenotypic  
630 and functional heterogeneity under different disease states (42). These range  
631 from traditional pro-inflammatory subsets during infections (13, 42) to B-helper  
632 PMNs (30, 43) to suppressive phenotypes in tumor microenvironments (44, 45)  
633 and anti-inflammatory in response certain pathogens and microbial products (13-  
634 16, 46-48). In the context of pneumococcal pneumonia, we previously found that  
635 the efficacy of PMNs during the course of disease changes from clearing bacteria  
636 early on to promoting infection at later time points (3). Here we show that this  
637 shift away from an anti-microbial phenotype is associated with a decrease in  
638 CD73 expression on PMNs. Using *in vitro* bacterial killing assays and adoptive  
639 transfer of PMNs into CD73<sup>-/-</sup> recipients, we found that CD73 expression on  
640 PMNs was crucial for the ability of these cells to kill *S. pneumoniae* and mediate  
641 protection during lung infection *in vivo*. In fact loss of CD73 expression on PMNs  
642 seem to actively promote bacterial growth as *S. pneumoniae* grew in the

643 presence of CD73<sup>-/-</sup> PMNs *in vitro* and adoptive transfer of CD73<sup>-/-</sup> PMNs  
644 worsened the infection resulting in increased bacterial burdens in the lungs,  
645 blood and brain of recipient mice. Importantly, CD73 mRNA was also expressed  
646 in PMNs isolated from all the human donors we tested and pharmacological  
647 inhibition of this enzyme *in vitro* abrogated the ability of PMNs to kill  
648 pneumococci in 60% of donors, highlighting the clinical relevance of this  
649 pathway. These findings suggest that CD73 expression on PMNs regulates their  
650 antimicrobial phenotype.

651         During systemic infection with *S. pneumoniae*, a subset of immature  
652 PMNs with a lower expression of surface Ly6G that exhibited a low ability to bind  
653 bacteria was observed immobilized in the spleen (30). When we followed Ly6G  
654 expression on PMNs (gated on Ly6G positive cells) over time, we noticed it  
655 changed over time where we observed an increase in Ly6G expression on  
656 pulmonary PMNs recruited at the 6 hour time point followed by a subsequent  
657 decrease after that. However, we observed that CD73 negative PMNs in the  
658 lungs had significantly lower amounts of Ly6G on their surface as compared to  
659 their CD73<sup>+</sup> counterparts at all time points suggesting that they could denote a  
660 less mature subset. We believe that these CD73-negative pulmonary PMNs  
661 migrate from the circulation after originating from the bone marrow, as the  
662 reduced expression of CD73 following infection was also observed on circulating  
663 PMNs as well as the PMN pool in the bone marrow.

664         In exploring mechanisms of how CD73 controls the PMN antimicrobial  
665 phenotype, we found that it inhibited IL-10 production in response to

666 pneumococcal infection. In wild type mice, we did not see any up regulation in IL-  
667 10 production by PMNs early in infection and IL-10 producing PMNs only started  
668 to accumulate at the 18h time point that coincided with a decrease in CD73 on  
669 pulmonary PMNs and their inability to control bacterial numbers (3). In contrast,  
670 PMNs from CD73<sup>-/-</sup> mice up regulated IL-10 production early on within 6 hours of  
671 infection, and our IL-10 blocking experiments both *in vitro* and *in vivo* suggest  
672 that this impaired the ability of these mice to control the infection. Our data align  
673 with previous reports that administration of IL-10 early in infection impairs the  
674 ability of the host to control pneumococcal numbers (10). However, studies have  
675 also found that mice that lack IL-10 had exacerbated PMN influx in their lungs  
676 (12, 37) and succumbed to the infection despite having lower bacterial burden in  
677 their organs (12). These findings suggest that early production of IL-10 is  
678 deleterious for the host's ability to control the infection, however, it may be  
679 required later on for resolution of inflammation and return to homeostasis.  
680 Therefore, the eventual accumulation of IL-10 producing PMNs in wild type mice  
681 we observed here may be beneficial in resolution of pulmonary inflammation  
682 observed in healthy hosts (3).

683 Murine PMNs have been described to produce IL-10 in sepsis models and  
684 in response to several bacterial infections such as *Escherichia coli*, *Shigella*  
685 *flexneri* (16) and *Staphylococcus aureus* (13) as well as parasitic infections such  
686 as *Leishmania major* (14) and *Trypanosoma cruzi* (15). In contrast, IL-10  
687 production by pulmonary PMNs was actively repressed during *Mycobacterium*  
688 *tuberculosis* (49). In this study, we did not detect an up regulation in IL-10

689 production by PMNs in response to *S. pneumoniae* infection in wild type mice  
690 either *in vivo* during lung challenge or *in vitro* in response to direct bacterial  
691 infection. Further, we were unable to detect an increase in IL-10 mRNA in PMNs  
692 isolated from human donors in response to stimulation with *S. pneumoniae*. This  
693 fits with previous studies demonstrating that resting human PMNs have histone  
694 modifications at the IL-10 locus rendering it transcriptionally silent (50) and that  
695 induction of IL-10 production by PMNs requires further stimulation such as direct  
696 contact with LPS-treated Tregs or IL-10 itself that promote histone  
697 posttranslational modifications that can activate IL-10 transcription (38).

698 Our data suggests that IL-10 production by PMNs in response to *S.*  
699 *pneumoniae* is actively down regulated by EAD production by CD73 as addition  
700 of exogenous adenosine to CD73<sup>-/-</sup> PMNs prevented the increase in IL-10  
701 production following infection. This is in contrast to what has been described for  
702 macrophages where adenosine induced IL-10 production by macrophages in  
703 response to LPS stimulation (35, 36) or *E. coli* infection (34) by acting via the  
704 A2A or A2B receptor to facilitate binding of transcription factors to the IL-10 locus  
705 and enhancing transcription (34) or via posttranscriptional modifications of the 3'-  
706 UTR that facilitated translation (35) respectively. These differences observed  
707 could be accounted for by the cell type i.e. macrophages vs. PMNs or the  
708 stimulation where the macrophage studies have been performed with Gram-  
709 negative bacteria and their products (LPS) while we are examining responses to  
710 a Gram positive organism.

711 PMNs were shown to kill *S. pneumoniae* in a manner that requires  
712 phagocytosis and serine proteases (4). In exploring how the CD73/IL-10 axis  
713 regulated PMN anti-pneumococcal activity we found that apoptosis, bacterial  
714 uptake and intracellular killing and production of anti-microbial Neutrophil  
715 Elastase and Myeloperoxidase were not affected by this pathway. Rather,  
716 inhibition of IL-10 production by CD73 was crucial for optimal production of  
717 extracellular ROS by PMNs upon *S. pneumoniae* infection. This is in line with  
718 previous findings that adenosine signaling via the A1 receptor enhanced  
719 superoxide production by PMNs in response to antibody coated erythrocytes (51)  
720 and that IL-10 blunted PMN superoxide production in response to PMA and *C.*  
721 *albicans* hyphae (18, 19).

722 Previous work showed that *S. pneumoniae* triggered extracellular  
723 respiratory burst by PMNs (52) and that PLY released by the bacteria also  
724 triggered production of intracellular ROS (23). Similarly, we found here that the  
725 bacterial infection triggered both intracellular and extracellular ROS production.  
726 NADPH oxidase is known to assemble both at the phagosomal membrane and  
727 on the cell surface in response to bacterial infections (53), here we found that  
728 CD73 was important for optimal extracellular ROS production but had no effect  
729 on intracellular ROS suggesting that this pathway may target cell surface  
730 assembly of the NADPH oxidase complex only. The role of ROS production in  
731 anti-pneumococcal function of PMNs and host resistance to *S. pneumoniae* is  
732 arguable. Studies showed that mice lacking components of the NADPH oxidase  
733 are not more susceptible to pneumococcal lung infection (30, 54) and that



734 inhibition of respiratory burst has no effect on the ability of PMNs to kill *S.*  
735 *pneumoniae* (4). In contrast, ROS production by PMN-derived MPO was  
736 important for bacterial clearance during pneumococcal otitis media (41) and  
737 bacterial mutants lacking components that detoxify ROS die more readily in  
738 response to oxidative stress (55-57).

739 Adenosine is a well-known regulator of PMN function and is known to  
740 regulate PMN recruitment, release of inflammatory cytokines, phagocytic  
741 capacity and oxidative burst (33). However, the majority of those studies have  
742 been conducted in the context of sterile inflammation or in response to *in vitro*  
743 stimulation by inflammatory mediators such as fMLP, LPS, TNF or inert particles  
744 (33). The role of the EAD pathway in PMN response to infections is now better  
745 appreciated and was shown to play a role in host resistance during pulmonary  
746 infections with influenza A virus (58, 59), *Klebsiella pneumoniae* (60) and *S.*  
747 *pneumoniae* (3). Here, we identified the mechanisms by which EAD production  
748 by CD73 regulated PMN anti-pneumococcal function and further found it was  
749 relevant for the function of PMNs from human donors. This may be relevant for  
750 incorporating clinically available adenosine-based drugs to combat  
751 pneumococcal pneumonia and other serious lung infections in the future.

752

### 753 **Authorship**

754 NS and JNL conducted research, analyzed data and wrote the paper. EYIT, MB  
755 and JYH conducted research, JML provided essential expertise and reviewed the

756 paper. ENBG designed research, conducted research, analyzed data, wrote the  
757 paper and had primary responsibility for final content.

758

### 759 **Acknowledgments**

760 We would like to acknowledge Andrew Camilli for bacterial strains. This work was  
761 supported by National Institute of Health grant R00AG051784 to ENBG.

762

### 763 **Conflict of Interest Disclosure**

764 None

765

### 766 **References**

- 767 1. Garvy BA, Harmsen AG. The importance of neutrophils in resistance to  
768 pneumococcal pneumonia in adult and neonatal mice. *Inflammation*.  
769 1996;20(5):499-512. Epub 1996/10/01. PubMed PMID: 8894714.
- 770 2. Rolston KV. The spectrum of pulmonary infections in cancer patients.  
771 *Current opinion in oncology*. 2001;13(4):218-23. Epub 2001/06/29. PubMed  
772 PMID: 11429477.
- 773 3. Bou Ghanem EN, Clark S, Roggensack SE, McIver SR, Alcaide P,  
774 Haydon PG, et al. Extracellular Adenosine Protects against *Streptococcus*  
775 *pneumoniae* Lung Infection by Regulating Pulmonary Neutrophil Recruitment.  
776 *PLoS pathogens*. 2015;11(8):e1005126. Epub 2015/08/28. doi:  
777 10.1371/journal.ppat.1005126. PubMed PMID: 26313746; PubMed Central  
778 PMCID: PMC4552087.

- 779 4. Standish AJ, Weiser JN. Human neutrophils kill *Streptococcus*  
780 *pneumoniae* via serine proteases. *J Immunol.* 2009;183(4):2602-9. Epub  
781 2009/07/22. doi: 10.4049/jimmunol.0900688. PubMed PMID: 19620298.
- 782 5. Hahn I, Klaus A, Janze AK, Steinwede K, Ding N, Bohling J, et al.  
783 Cathepsin G and neutrophil elastase play critical and nonredundant roles in lung-  
784 protective immunity against *Streptococcus pneumoniae* in mice. *Infect Immun.*  
785 2011;79(12):4893-901. Epub 2011/09/14. doi: 10.1128/IAI.05593-11. PubMed  
786 PMID: 21911460; PubMed Central PMCID: PMC3232647.
- 787 6. Bhowmick R, Tin Maung NH, Hurley BP, Ghanem EB, Gronert K,  
788 McCormick BA, et al. Systemic disease during *Streptococcus pneumoniae* acute  
789 lung infection requires 12-lipoxygenase-dependent inflammation. *J Immunol.*  
790 2013;191(10):5115-23. Epub 2013/10/04. doi: 10.4049/jimmunol.1300522.  
791 PubMed PMID: 24089193; PubMed Central PMCID: PMC3836588.
- 792 7. Bou Ghanem EN, Clark S, Du X, Wu D, Camilli A, Leong JM, et al. The  
793 alpha-tocopherol form of vitamin E reverses age-associated susceptibility to  
794 *streptococcus pneumoniae* lung infection by modulating pulmonary neutrophil  
795 recruitment. *J Immunol.* 2015;194(3):1090-9. Epub 2014/12/17. doi:  
796 10.4049/jimmunol.1402401. PubMed PMID: 25512603; PubMed Central PMCID:  
797 PMC4834212.
- 798 8. Thompson LF, Eltzschig HK, Ibla JC, Van De Wiele CJ, Resta R, Morote-  
799 Garcia JC, et al. Crucial role for ecto-5'-nucleotidase (CD73) in vascular leakage  
800 during hypoxia. *The Journal of experimental medicine.* 2004;200(11):1395-405.

- 801 Epub 2004/12/08. doi: 10.1084/jem.20040915. PubMed PMID: 15583013;  
802 PubMed Central PMCID: PMC1237012.
- 803 9. Hasko G, Linden J, Cronstein B, Pacher P. Adenosine receptors:  
804 therapeutic aspects for inflammatory and immune diseases. *Nature reviews Drug*  
805 *discovery*. 2008;7(9):759-70. Epub 2008/09/02. doi: 10.1038/nrd2638. PubMed  
806 PMID: 18758473; PubMed Central PMCID: PMC2568887.
- 807 10. van der Poll T, Marchant A, Keogh CV, Goldman M, Lowry SF. Interleukin-  
808 10 impairs host defense in murine pneumococcal pneumonia. *J Infect Dis*.  
809 1996;174(5):994-1000. Epub 1996/11/01. PubMed PMID: 8896500.
- 810 11. van der Sluijs KF, van Elden LJ, Nijhuis M, Schuurman R, Pater JM,  
811 Florquin S, et al. IL-10 is an important mediator of the enhanced susceptibility to  
812 pneumococcal pneumonia after influenza infection. *J Immunol*.  
813 2004;172(12):7603-9. Epub 2004/06/10. PubMed PMID: 15187140.
- 814 12. Penaloza HF, Nieto PA, Munoz-Durango N, Salazar-Echegarai FJ, Torres  
815 J, Parga MJ, et al. Interleukin-10 plays a key role in the modulation of neutrophils  
816 recruitment and lung inflammation during infection by *Streptococcus*  
817 *pneumoniae*. *Immunology*. 2015;146(1):100-12. Epub 2015/06/03. doi:  
818 10.1111/imm.12486. PubMed PMID: 26032199; PubMed Central PMCID:  
819 PMC4552505.
- 820 13. Tsuda Y, Takahashi H, Kobayashi M, Hanafusa T, Herndon DN, Suzuki F.  
821 Three different neutrophil subsets exhibited in mice with different susceptibilities  
822 to infection by methicillin-resistant *Staphylococcus aureus*. *Immunity*.

- 823 2004;21(2):215-26. Epub 2004/08/17. doi: 10.1016/j.immuni.2004.07.006.
- 824 PubMed PMID: 15308102.
- 825 14. Charmoy M, Megnekou R, Allenbach C, Zweifel C, Perez C, Monnat K, et  
826 al. Leishmania major induces distinct neutrophil phenotypes in mice that are  
827 resistant or susceptible to infection. J Leukoc Biol. 2007;82(2):288-99. Epub  
828 2007/04/24. doi: 10.1189/jlb.0706440. PubMed PMID: 17449725.
- 829 15. Tosello Boari J, Amezcua Vesely MC, Bermejo DA, Ramello MC, Montes  
830 CL, Cejas H, et al. IL-17RA signaling reduces inflammation and mortality during  
831 Trypanosoma cruzi infection by recruiting suppressive IL-10-producing  
832 neutrophils. PLoS pathogens. 2012;8(4):e1002658. Epub 2012/05/12. doi:  
833 10.1371/journal.ppat.1002658. PubMed PMID: 22577359; PubMed Central  
834 PMCID: PMC3343119.
- 835 16. Zhang X, Majlessi L, Deriaud E, Leclerc C, Lo-Man R. Coactivation of Syk  
836 kinase and MyD88 adaptor protein pathways by bacteria promotes regulatory  
837 properties of neutrophils. Immunity. 2009;31(5):761-71. Epub 2009/11/17. doi:  
838 10.1016/j.immuni.2009.09.016. PubMed PMID: 19913447.
- 839 17. Kasten KR, Muenzer JT, Caldwell CC. Neutrophils are significant  
840 producers of IL-10 during sepsis. Biochemical and biophysical research  
841 communications. 2010;393(1):28-31. Epub 2010/01/26. doi:  
842 10.1016/j.bbrc.2010.01.066. PubMed PMID: 20097159; PubMed Central PMCID:  
843 PMC2830356.
- 844 18. Laichalk LL, Danforth JM, Standiford TJ. Interleukin-10 inhibits neutrophil  
845 phagocytic and bactericidal activity. FEMS immunology and medical

- 846 microbiology. 1996;15(4):181-7. Epub 1996/10/01. doi: 10.1111/j.1574-  
847 695X.1996.tb00084.x. PubMed PMID: 8908479.
- 848 19. Roilides E, Katsifa H, Tsaparidou S, Stergiopoulou T, Panteliadis C,  
849 Walsh TJ. Interleukin 10 suppresses phagocytic and antihyphal activities of  
850 human neutrophils. Cytokine. 2000;12(4):379-87. Epub 2000/05/11. doi:  
851 10.1006/cyto.1999.0567. PubMed PMID: 10805220.
- 852 20. Greene NG, Narciso AR, Filipe SR, Camilli A. Peptidoglycan Branched  
853 Stem Peptides Contribute to *Streptococcus pneumoniae* Virulence by Inhibiting  
854 Pneumolysin Release. PLoS pathogens. 2015;11(6):e1004996. Epub  
855 2015/06/27. doi: 10.1371/journal.ppat.1004996. PubMed PMID: 26114646;  
856 PubMed Central PMCID: PMC4483231.
- 857 21. Swamydas M, Lionakis MS. Isolation, purification and labeling of mouse  
858 bone marrow neutrophils for functional studies and adoptive transfer  
859 experiments. Journal of visualized experiments : JoVE. 2013(77):e50586. Epub  
860 2013/07/31. doi: 10.3791/50586. PubMed PMID: 23892876; PubMed Central  
861 PMCID: PMC3732092.
- 862 22. Lysenko ES, Clarke TB, Shchepetov M, Ratner AJ, Roper DI, Dowson  
863 CG, et al. Nod1 signaling overcomes resistance of *S. pneumoniae* to  
864 opsonophagocytic killing. PLoS pathogens. 2007;3(8):e118. Epub 2007/08/29.  
865 doi: 10.1371/journal.ppat.0030118. PubMed PMID: 17722978; PubMed Central  
866 PMCID: PMC1950946.
- 867 23. Martner A, Dahlgren C, Paton JC, Wold AE. Pneumolysin released during  
868 *Streptococcus pneumoniae* autolysis is a potent activator of intracellular oxygen

- 869 radical production in neutrophils. *Infect Immun.* 2008;76(9):4079-87. Epub  
870 2008/06/19. doi: 10.1128/IAI.01747-07. PubMed PMID: 18559434; PubMed  
871 Central PMCID: PMC2519426.
- 872 24. Dahlgren C, Follin P, Johansson A, Lock R, Orselius K. Localization of the  
873 luminol-dependent chemiluminescence reaction in human granulocytes. *Journal*  
874 *of bioluminescence and chemiluminescence.* 1989;4(1):263-6. Epub 1989/07/01.  
875 doi: 10.1002/bio.1170040137. PubMed PMID: 2552755.
- 876 25. Dahlgren C, Karlsson A. Respiratory burst in human neutrophils. *Journal*  
877 *of immunological methods.* 1999;232(1-2):3-14. Epub 2000/01/05. PubMed  
878 PMID: 10618505.
- 879 26. RajECKy M, Lojek A, Ciz M. Differentiating between intra- and extracellular  
880 chemiluminescence in diluted whole-blood samples. *International journal of*  
881 *laboratory hematology.* 2012;34(2):136-42. Epub 2011/08/13. doi:  
882 10.1111/j.1751-553X.2011.01370.x. PubMed PMID: 21834798.
- 883 27. Mook-Kanamori B, Geldhoff M, Troost D, van der Poll T, van de Beek D.  
884 Characterization of a pneumococcal meningitis mouse model. *BMC infectious*  
885 *diseases.* 2012;12:71. Epub 2012/03/30. doi: 10.1186/1471-2334-12-71. PubMed  
886 PMID: 22455545; PubMed Central PMCID: PMC3364848.
- 887 28. Bou Ghanem EN, Lee JN, Joma BH, Meydani SN, Leong JM, Panda A.  
888 The Alpha-Tocopherol Form of Vitamin E Boosts Elastase Activity of Human  
889 PMNs and Their Ability to Kill *Streptococcus pneumoniae*. *Frontiers in cellular*  
890 *and infection microbiology.* 2017;7:161. Epub 2017/05/19. doi:

- 891 10.3389/fcimb.2017.00161. PubMed PMID: 28516066; PubMed Central PMCID:  
892 PMC5413490.
- 893 29. Livak KJ, Schmittgen TD. Analysis of relative gene expression data using  
894 real-time quantitative PCR and the 2(-Delta Delta C(T)) Method. *Methods*.  
895 2001;25(4):402-8. Epub 2002/02/16. doi: 10.1006/meth.2001.1262. PubMed  
896 PMID: 11846609.
- 897 30. Deniset JF, Surewaard BG, Lee WY, Kubes P. Splenic Ly6G(high) mature  
898 and Ly6G(int) immature neutrophils contribute to eradication of *S. pneumoniae*.  
899 *The Journal of experimental medicine*. 2017;214(5):1333-50. Epub 2017/04/21.  
900 doi: 10.1084/jem.20161621. PubMed PMID: 28424248; PubMed Central PMCID:  
901 PMC5413339.
- 902 31. Benton KA, Everson MP, Briles DE. A pneumolysin-negative mutant of  
903 *Streptococcus pneumoniae* causes chronic bacteremia rather than acute sepsis  
904 in mice. *Infect Immun*. 1995;63(2):448-55. Epub 1995/02/01. PubMed PMID:  
905 7822009; PubMed Central PMCID: PMC173016.
- 906 32. Korkmaz B, Horwitz MS, Jenne DE, Gauthier F. Neutrophil elastase,  
907 proteinase 3, and cathepsin G as therapeutic targets in human diseases.  
908 *Pharmacological reviews*. 2010;62(4):726-59. Epub 2010/11/17. doi:  
909 10.1124/pr.110.002733. PubMed PMID: 21079042; PubMed Central PMCID:  
910 PMC2993259.
- 911 33. Barletta KE, Ley K, Mehrad B. Regulation of neutrophil function by  
912 adenosine. *Arteriosclerosis, thrombosis, and vascular biology*. 2012;32(4):856-



- 913 64. Epub 2012/03/17. doi: 10.1161/ATVBAHA.111.226845. PubMed PMID:  
914 22423037; PubMed Central PMCID: PMC3353547.
- 915 34. Csoka B, Nemeth ZH, Virag L, Gergely P, Leibovich SJ, Pacher P, et al.  
916 A2A adenosine receptors and C/EBPbeta are crucially required for IL-10  
917 production by macrophages exposed to Escherichia coli. *Blood*.  
918 2007;110(7):2685-95. Epub 2007/05/26. doi: 10.1182/blood-2007-01-065870.  
919 PubMed PMID: 17525287; PubMed Central PMCID: PMC1988939.
- 920 35. Nemeth ZH, Lutz CS, Csoka B, Deitch EA, Leibovich SJ, Gause WC, et al.  
921 Adenosine augments IL-10 production by macrophages through an A2B  
922 receptor-mediated posttranscriptional mechanism. *J Immunol*.  
923 2005;175(12):8260-70. Epub 2005/12/13. PubMed PMID: 16339566; PubMed  
924 Central PMCID: PMC2000336.
- 925 36. Cohen HB, Briggs KT, Marino JP, Ravid K, Robson SC, Mosser DM. TLR  
926 stimulation initiates a CD39-based autoregulatory mechanism that limits  
927 macrophage inflammatory responses. *Blood*. 2013;122(11):1935-45. Epub  
928 2013/08/03. doi: 10.1182/blood-2013-04-496216. PubMed PMID: 23908469;  
929 PubMed Central PMCID: PMC3772500.
- 930 37. Williams AE, Jose RJ, Brown JS, Chambers RC. Enhanced inflammation  
931 in aged mice following infection with *Streptococcus pneumoniae* is associated  
932 with decreased IL-10 and augmented chemokine production. *American journal of*  
933 *physiology Lung cellular and molecular physiology*. 2015;308(6):L539-49. Epub  
934 2015/01/18. doi: 10.1152/ajplung.00141.2014. PubMed PMID: 25595646;  
935 PubMed Central PMCID: PMC4360060.

- 936 38. Lewkowicz N, Mycko MP, Przygodzka P, Cwiklinska H, Cichalewska M,  
937 Matysiak M, et al. Induction of human IL-10-producing neutrophils by LPS-  
938 stimulated Treg cells and IL-10. *Mucosal immunology*. 2016;9(2):364-78. Epub  
939 2015/07/30. doi: 10.1038/mi.2015.66. PubMed PMID: 26220165.
- 940 39. McCracken JM, Allen LA. Regulation of human neutrophil apoptosis and  
941 lifespan in health and disease. *Journal of cell death*. 2014;7:15-23. Epub  
942 2014/10/04. doi: 10.4137/JCD.S11038. PubMed PMID: 25278783; PubMed  
943 Central PMCID: PMC4167320.
- 944 40. Zysk G, Bejo L, Schneider-Wald BK, Nau R, Heinz H. Induction of  
945 necrosis and apoptosis of neutrophil granulocytes by *Streptococcus pneumoniae*.  
946 *Clinical and experimental immunology*. 2000;122(1):61-6. Epub 2000/09/30.  
947 PubMed PMID: 11012619; PubMed Central PMCID: PMC1905755.
- 948 41. Xiang Y, Jin C, Wang W, Wang Z, Huang Y, Fan F, et al. The critical role  
949 of myeloperoxidase in *Streptococcus pneumoniae* clearance and tissue damage  
950 during mouse acute otitis media. *Innate immunity*. 2017;23(3):296-306. Epub  
951 2017/04/01. doi: 10.1177/1753425917693907. PubMed PMID: 28359218.
- 952 42. Deniset JF, Kubes P. Neutrophil heterogeneity: Bona fide subsets or  
953 polarization states? *J Leukoc Biol*. 2018;103(5):829-38. Epub 2018/02/21. doi:  
954 10.1002/JLB.3RI0917-361R. PubMed PMID: 29462505.
- 955 43. Puga I, Cols M, Barra CM, He B, Cassis L, Gentile M, et al. B cell-helper  
956 neutrophils stimulate the diversification and production of immunoglobulin in the  
957 marginal zone of the spleen. *Nature immunology*. 2011;13(2):170-80. Epub

958 2011/12/27. doi: 10.1038/ni.2194. PubMed PMID: 22197976; PubMed Central  
959 PMCID: PMC3262910.

960 44. Fridlender ZG, Sun J, Kim S, Kapoor V, Cheng G, Ling L, et al.  
961 Polarization of tumor-associated neutrophil phenotype by TGF-beta: "N1" versus  
962 "N2" TAN. *Cancer cell*. 2009;16(3):183-94. Epub 2009/09/08. doi:  
963 10.1016/j.ccr.2009.06.017. PubMed PMID: 19732719; PubMed Central PMCID:  
964 PMC2754404.

965 45. Pillay J, Tak T, Kamp VM, Koenderman L. Immune suppression by  
966 neutrophils and granulocytic myeloid-derived suppressor cells: similarities and  
967 differences. *Cellular and molecular life sciences : CMLS*. 2013;70(20):3813-27.  
968 Epub 2013/02/21. doi: 10.1007/s00018-013-1286-4. PubMed PMID: 23423530;  
969 PubMed Central PMCID: PMC3781313.

970 46. De Santo C, Arscott R, Booth S, Karydis I, Jones M, Asher R, et al.  
971 Invariant NKT cells modulate the suppressive activity of IL-10-secreting  
972 neutrophils differentiated with serum amyloid A. *Nature immunology*.  
973 2010;11(11):1039-46. Epub 2010/10/05. doi: 10.1038/ni.1942. PubMed PMID:  
974 20890286; PubMed Central PMCID: PMC3001335.

975 47. Kamp VM, Pillay J, Lammers JW, Pickkers P, Ulfman LH, Koenderman L.  
976 Human suppressive neutrophils CD16<sup>bright</sup>/CD62L<sup>dim</sup> exhibit decreased  
977 adhesion. *J Leukoc Biol*. 2012;92(5):1011-20. Epub 2012/08/29. doi:  
978 10.1189/jlb.0612273. PubMed PMID: 22927481.

979 48. Pillay J, Kamp VM, van Hoffen E, Visser T, Tak T, Lammers JW, et al. A  
980 subset of neutrophils in human systemic inflammation inhibits T cell responses

981 through Mac-1. *The Journal of clinical investigation*. 2012;122(1):327-36. Epub  
982 2011/12/14. doi: 10.1172/JCI57990. PubMed PMID: 22156198; PubMed Central  
983 PMCID: PMC3248287.

984 49. Huynh JP, Lin CC, Kimmey JM, Jarjour NN, Schwarzkopf EA, Bradstreet  
985 TR, et al. Bhlhe40 is an essential repressor of IL-10 during *Mycobacterium*  
986 tuberculosis infection. *The Journal of experimental medicine*. 2018;215(7):1823-  
987 38. Epub 2018/05/19. doi: 10.1084/jem.20171704. PubMed PMID: 29773644;  
988 PubMed Central PMCID: PMC6028511.

989 50. Tamassia N, Zimmermann M, Castellucci M, Ostuni R, Bruderek K,  
990 Schilling B, et al. Cutting edge: An inactive chromatin configuration at the IL-10  
991 locus in human neutrophils. *J Immunol*. 2013;190(5):1921-5. Epub 2013/01/29.  
992 doi: 10.4049/jimmunol.1203022. PubMed PMID: 23355741.

993 51. Salmon JE, Cronstein BN. Fc gamma receptor-mediated functions in  
994 neutrophils are modulated by adenosine receptor occupancy. A1 receptors are  
995 stimulatory and A2 receptors are inhibitory. *J Immunol*. 1990;145(7):2235-40.  
996 Epub 1990/10/01. PubMed PMID: 2168919.

997 52. Barbuti G, Moschioni M, Fumarulo R, Censini S, Montemurro P.  
998 *Streptococcus pneumoniae* modulates the respiratory burst response in human  
999 neutrophils. *FEMS immunology and medical microbiology*. 2010;60(1):57-62.  
1000 Epub 2010/07/14. doi: 10.1111/j.1574-695X.2010.00716.x. PubMed PMID:  
1001 20618848.

1002 53. Allen LA, McCaffrey RL. To activate or not to activate: distinct strategies  
1003 used by *Helicobacter pylori* and *Francisella tularensis* to modulate the NADPH

1004 oxidase and survive in human neutrophils. *Immunol Rev.* 2007;219:103-17. Epub  
1005 2007/09/14. doi: 10.1111/j.1600-065X.2007.00544.x. PubMed PMID: 17850485.  
1006 54. Marriott HM, Jackson LE, Wilkinson TS, Simpson AJ, Mitchell TJ, Buttle  
1007 DJ, et al. Reactive oxygen species regulate neutrophil recruitment and survival in  
1008 pneumococcal pneumonia. *American journal of respiratory and critical care*  
1009 *medicine.* 2008;177(8):887-95. Epub 2008/01/19. doi: 10.1164/rccm.200707-  
1010 990OC. PubMed PMID: 18202350; PubMed Central PMCID: PMC2643216.  
1011 55. Pericone CD, Park S, Imlay JA, Weiser JN. Factors contributing to  
1012 hydrogen peroxide resistance in *Streptococcus pneumoniae* include pyruvate  
1013 oxidase (SpxB) and avoidance of the toxic effects of the fenton reaction. *Journal*  
1014 *of bacteriology.* 2003;185(23):6815-25. Epub 2003/11/18. PubMed PMID:  
1015 14617646; PubMed Central PMCID: PMC262707.  
1016 56. Tseng HJ, McEwan AG, Paton JC, Jennings MP. Virulence of  
1017 *Streptococcus pneumoniae*: PsaA mutants are hypersensitive to oxidative stress.  
1018 *Infect Immun.* 2002;70(3):1635-9. Epub 2002/02/21. PubMed PMID: 11854257;  
1019 PubMed Central PMCID: PMC127802.  
1020 57. Eijkelkamp BA, Morey JR, Ween MP, Ong CL, McEwan AG, Paton JC, et  
1021 al. Extracellular zinc competitively inhibits manganese uptake and compromises  
1022 oxidative stress management in *Streptococcus pneumoniae*. *PloS one.*  
1023 2014;9(2):e89427. Epub 2014/02/22. doi: 10.1371/journal.pone.0089427.  
1024 PubMed PMID: 24558498; PubMed Central PMCID: PMC3928430.  
1025 58. Aeffner F, Woods PS, Davis IC. Activation of A1-adenosine receptors  
1026 promotes leukocyte recruitment to the lung and attenuates acute lung injury in

1027 mice infected with influenza A/WSN/33 (H1N1) virus. Journal of virology.  
1028 2014;88(17):10214-27. Epub 2014/06/27. doi: 10.1128/JVI.01068-14. PubMed  
1029 PMID: 24965449; PubMed Central PMCID: PMC4136329.

1030 59. Aeffner F, Woods PS, Davis IC. Ecto-5'-nucleotidase CD73 modulates the  
1031 innate immune response to influenza infection but is not required for  
1032 development of influenza-induced acute lung injury. American journal of  
1033 physiology Lung cellular and molecular physiology. 2015;309(11):L1313-22.  
1034 Epub 2015/10/04. doi: 10.1152/ajplung.00130.2015. PubMed PMID: 26432867;  
1035 PubMed Central PMCID: PMC4669338.

1036 60. Barletta KE, Cagnina RE, Burdick MD, Linden J, Mehrad B. Adenosine  
1037 A(2B) receptor deficiency promotes host defenses against gram-negative  
1038 bacterial pneumonia. American journal of respiratory and critical care medicine.  
1039 2012;186(10):1044-50. Epub 2012/09/22. doi: 10.1164/rccm.201204-0622OC.  
1040 PubMed PMID: 22997203; PubMed Central PMCID: PMC3530209.

1041

## 1042 **Figure Legends**

1043 **Figure 1. Expression of CD73 on pulmonary PMNs changes over the course**  
1044 **of infection.** C57BL/6 mice were inoculated i.t with  $5 \times 10^5$  CFU of *S. pneumoniae*  
1045 TIGR4. The blood, bone marrow and lungs were harvested, plated for bacterial  
1046 enumeration and analyzed by flow cytometry. (A) Mice were euthanized at 0, 6,  
1047 12, 18, 24 and 48 hours following infection. We then compared bacterial numbers  
1048 in the lungs to PMN numbers (Ly6G+ cells) for the first 0-12 and subsequent 18-  
1049 72 hours post infection and performed Pearson correlation analysis where

1050 asterisks, denotes significant correlation. We gated on PMNs (Ly6G+ cells) and  
1051 also monitored (B) the percentage of cells expressing CD73 and (B-C) the  
1052 amounts of CD73 (mean fluorescent intensity or MFI) in the indicated organs, at  
1053 the indicated time points. (D) We gated on all Ly6G+ cells and then gated on  
1054 CD73 positive versus negative populations and compared the expression (MFI)  
1055 of Ly6G. Data are pooled from two separate experiments with 4-5 mice per time  
1056 point (A) and 4-7 mice per time point (B-D). Asterisks indicate significant  
1057 differences from uninfected controls calculated by Student's t-test.

1058

1059 **Figure 2. CD73 and extracellular adenosine are required for the ability of**  
1060 **neutrophils to kill *S. pneumoniae*.** (A) PMNs were isolated from the bone  
1061 marrow of C57BL/6 (WT) or CD73<sup>-/-</sup> mice and treated with 100μM Adenosine or  
1062 PBS (vehicle control) for 30 minutes at 37°C. The reactions were then infected  
1063 with *S. pneumoniae* pre-opsonized with homologous sera for 45 minutes at 37°C.  
1064 Reactions were then stopped by placing samples on ice and viable CFU were  
1065 determined after serial dilution and plating. The percentage of bacteria killed  
1066 upon incubation with PMNs was determined by comparing surviving CFU to a no  
1067 PMN control. Positive percent killing indicates bacterial death while negative  
1068 percent indicates bacterial growth. Data shown are pooled from three separate  
1069 experiments (n=3 biological replicated or mice per strain) where each condition  
1070 was tested in triplicate (n=3 technical replicates) per experiment. Asterisks  
1071 indicate significance calculated by Student's t-test.

1072

1073 **Figure 3. CD73 is required for the ability of neutrophils isolated from**  
1074 **human donors to kill *S. pneumoniae*.** PMNs were isolated from the blood of  
1075 young healthy donors and (A) pre-treated with CD73 inhibitor ( $\alpha,\beta$  methylene  
1076 ADP) or vehicle control for 30 minutes at 37°C and then incubated for 45 minutes  
1077 with complement-opsonized *S. pneumoniae* TIGR4. For each donor, the average  
1078 percent bacterial killing compared to a no PMN control was calculated from  
1079 triplicate wells per condition. Data from 7 donors are shown. (B) RNA was  
1080 isolated from resting PMNs of the indicated donors and the expression of CD73  
1081 mRNA was measured by RT-qPCR and normalized to GAPDH. Significant  
1082 differences denoted by asterisk, were determined by Student's t-test.

1083

1084 **Figure 4. Adoptive transfer of PMNs from wild type mice boosts resistance**  
1085 **of CD73<sup>-/-</sup> mice to *S. pneumoniae*.** CD73<sup>-/-</sup> mice were mock treated (no transfer)  
1086 or injected i.p with  $2.5 \times 10^6$  PMNs isolated from the bone marrow of C57BL/6 or  
1087 CD73<sup>-/-</sup> mice. One hour post transfer, mice were infected i.t with  $5 \times 10^5$  CFU of *S.*  
1088 *pneumoniae* and bacterial numbers in the lung (A), blood (B) and brain (C) were  
1089 determined 24 hours post infection. Significant differences, determined by  
1090 Student's t-test, are indicated by asterisks. Representative data from one of three  
1091 separate experiments (n=3 mice per group) are shown.

1092

1093 **Figure 5. Extracellular adenosine blunts IL-10 production from PMNs**  
1094 **following infection.** (A) PMNs from the indicated mouse strains were incubated  
1095 for 45 minutes at 37°C with *S. pneumoniae* pre-opsonized with homologous sera



1096 or mock treated with buffer and homologous sera (uninfected). The supernatants  
1097 were then collected and assayed for IL-10 production by ELISA. (B) PBS control  
1098 or adenosine (100 $\mu$ M) were added to the PMNs 20 minutes prior to infection and  
1099 the fold-change in IL-10 production was calculated by dividing the values of  
1100 infected reactions by uninfected controls for each condition. Data were pooled  
1101 from three separate experiments (n=3 mice) with each condition tested in  
1102 triplicate per experiment. Asterisks indicate significant differences determined by  
1103 Student's t-test.

1104

1105 **Figure 6. IL-10 impairs the ability of PMNs to kill *S. pneumoniae*.** PMNs from  
1106 C57BL/6 or CD73<sup>-/-</sup> mice were incubated for 20 minutes with the indicated anti-IL-  
1107 10 (1 $\mu$ g/ml JES5-2A5), isotype control (1 $\mu$ g/ml), rIL-10 (50ng/ml) or adenosine  
1108 (100 $\mu$ M) and then infected with pre-opsonized *S. pneumoniae* for 45 minutes at  
1109 37°C. Reactions were then plated on blood agar plates and the percentage of  
1110 bacteria killed compared to a no PMN control under the same conditions was  
1111 calculated. Data shown are pooled from three separate experiments (n=3 mice  
1112 per strain) with each condition tested in triplicate. Asterisks indicate significant  
1113 differences determined by Student's t-test.

1114

1115 **Figure 7. Inhibition of IL-10 production by CD73 is important for optimal**  
1116 **production of extracellular reactive oxygen species by PMNs in response**  
1117 **to *S. pneumoniae* infection.** PMN were isolated from the bone marrow of the  
1118 indicated strains of mice and left untreated (A and B) or treated with the indicated

1119 rIL-10 (50ng/ml) (C) or anti-IL-10 (1 $\mu$ g/ml JES5-2A5) or isotype control (1 $\mu$ g/ml)  
1120 (D). PMNs were then infected with *S. pneumoniae* pre-opsionized with  
1121 homologous sera (+Sp) or treated with 3% matching sera (uninfected) and  
1122 intracellular ROS production measured by chemiluminescence of Luminol (A) or  
1123 extracellular ROS production measured by chemiluminescence of Isoluminol in  
1124 the presence of HRP (B-D). Representative data are shown from one of six (B)  
1125 and one of four (A, C-D) separate experiments with one mouse per strain per  
1126 experiment where each condition is tested in quadruplicates. Significant  
1127 differences ( $p < 0.05$ ) were determined by 2-way ANOVA followed by Sidak's  
1128 multiple comparisons test.

1129

1130 **Figure 8. Pulmonary PMNs from CD73<sup>-/-</sup> mice produce IL-10 early on during**  
1131 ***S. pneumoniae* infection.** Wild-type C57BL/6 or CD73<sup>-/-</sup> mice were mock-  
1132 infected or i.t challenged with 5 x 10<sup>5</sup> CFU of *S. pneumoniae*. Six (grey bars) and  
1133 18 hours (black bars) following challenge, (A) the percentage of IL-10 producing  
1134 PMNs (Ly6G+), (B) the mean florescent intensities (MFI) of IL-10 in PMNs  
1135 (Ly6G+) and (C) the number of IL-10 producing PMNs (Ly6G+) recruited into the  
1136 lungs were determined by intracellular cytokine staining and flow cytometry (see  
1137 Materials and Methods). Pooled data are from three separate experiments (n=6-9  
1138 mice per strain per time point). Significant differences determined by Student's t-  
1139 test are indicated by asterisks.

1140

1141 **Figure 9. Blocking IL-10 pre-infection partially reverses the susceptibility of**  
1142 **CD73<sup>-/-</sup> mice to pneumococcal challenge.** CD73<sup>-/-</sup> mice were treated i.p with IL-  
1143 10 blocking antibodies (anti-IL-10) or isotype control two hours prior to pulmonary  
1144 challenge with  $5 \times 10^5$  CFU of *S. pneumoniae*. Pneumococcal burdens in the lungs  
1145 (A) and blood (B) were determined 48 hours post-infection. Pooled data from two  
1146 separate experiments with 8 mice per group are shown. Values significantly  
1147 different by Student's t-test are indicated by asterisk.  
1148

**Figure 1.****A.**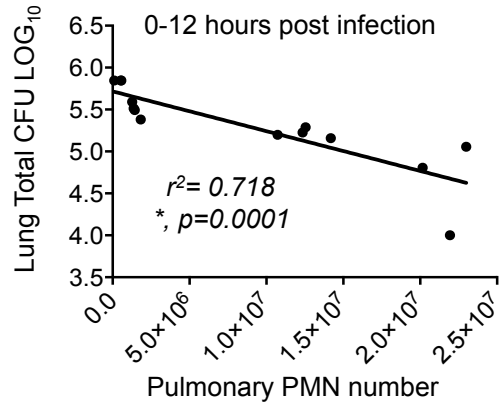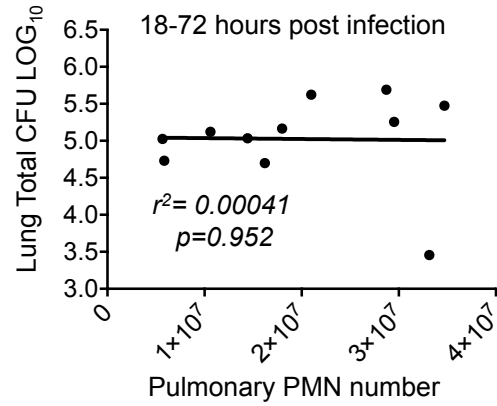**B.**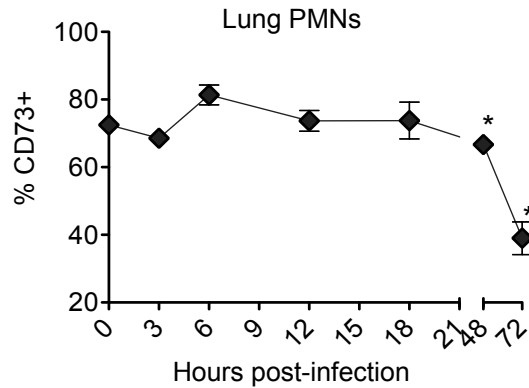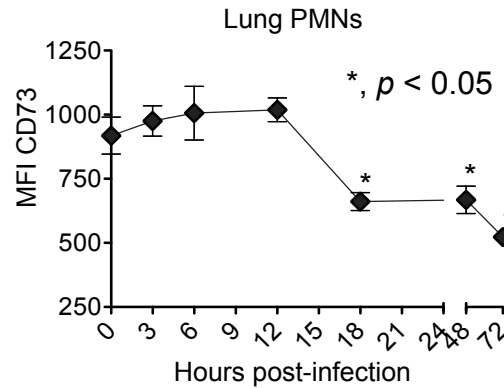**C.**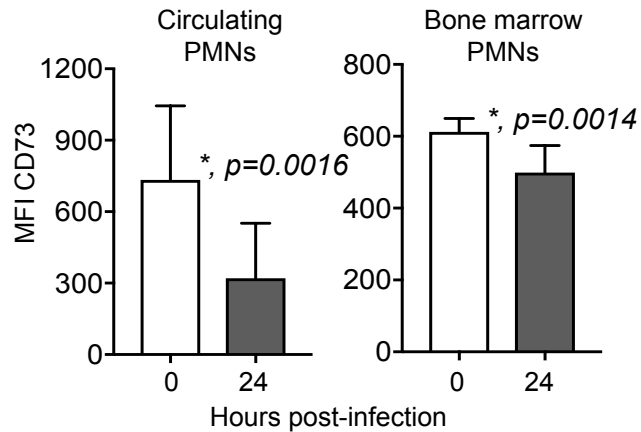**D.**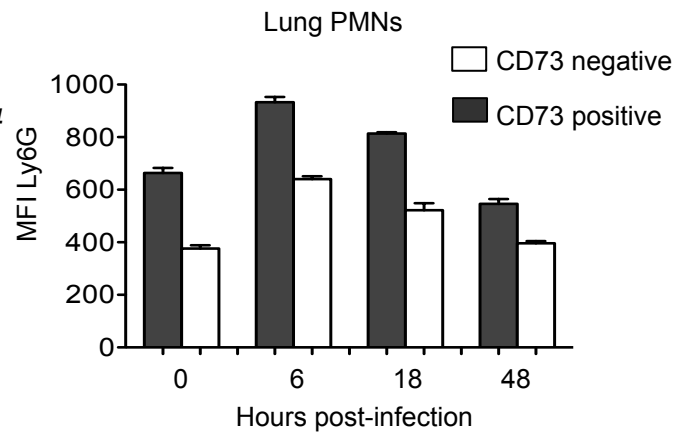

**Figure 2.**

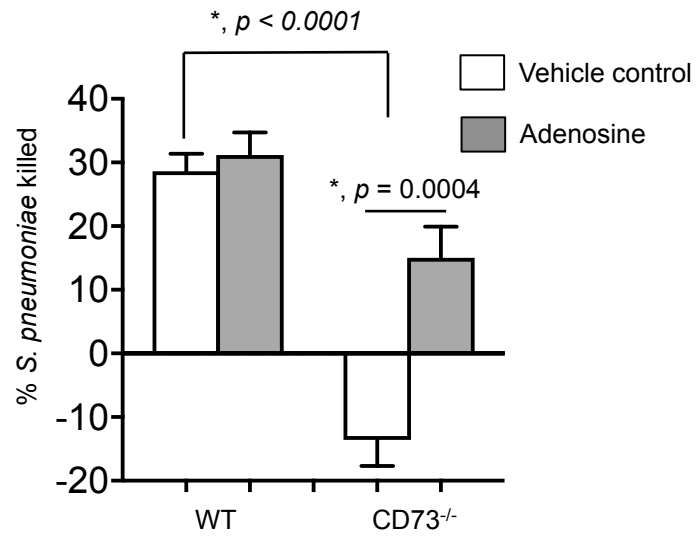

**Figure 3.**

**A.**

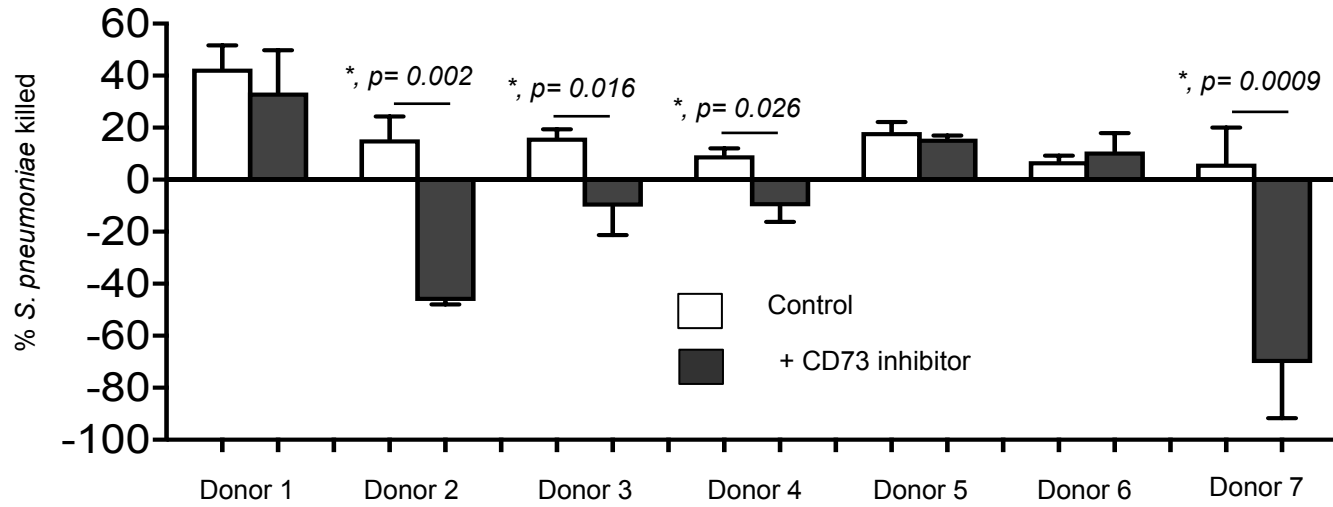

**B.**

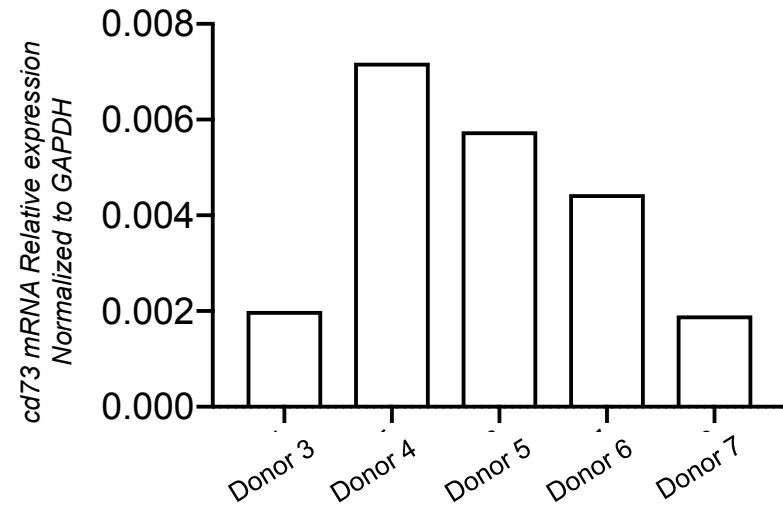

**Figure 4.**

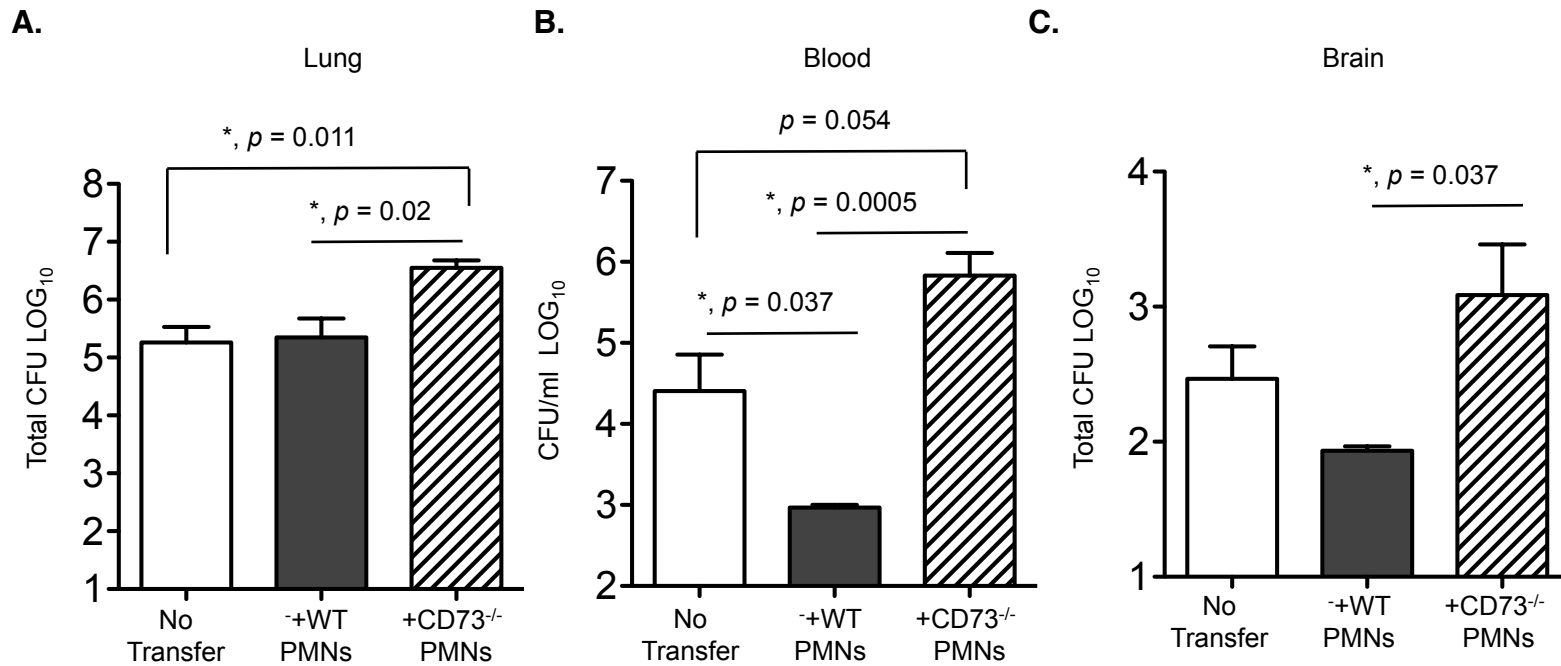

Figure 5.

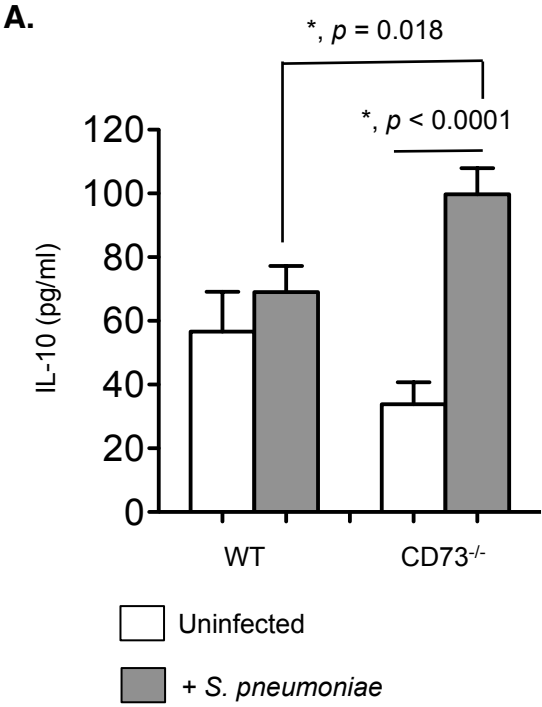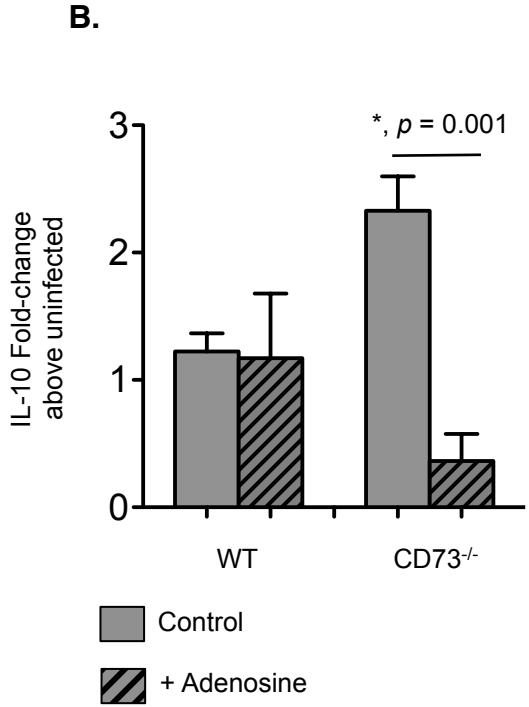



Figure 6.

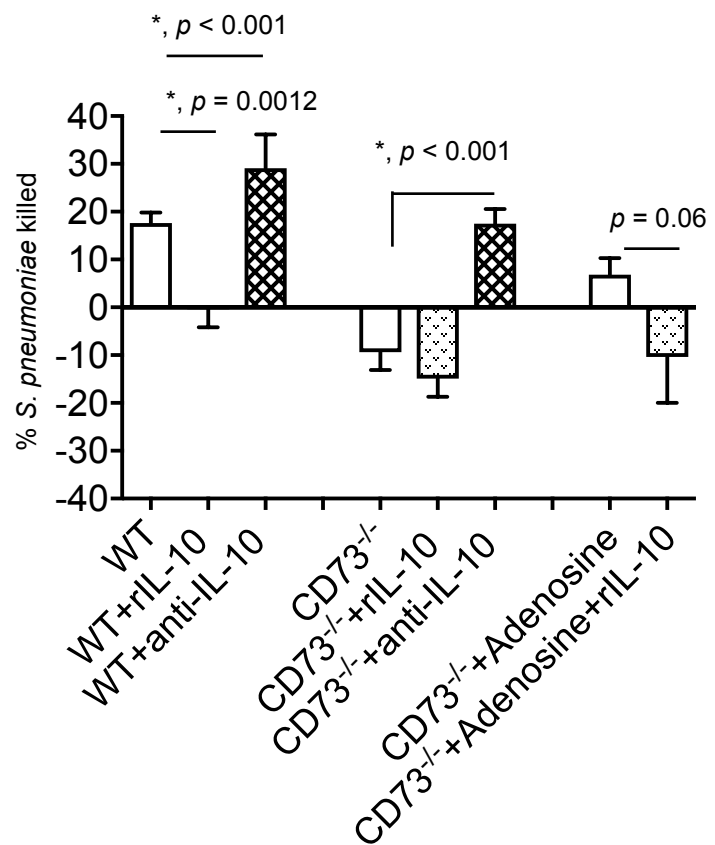

**Figure 7.**

**A.**

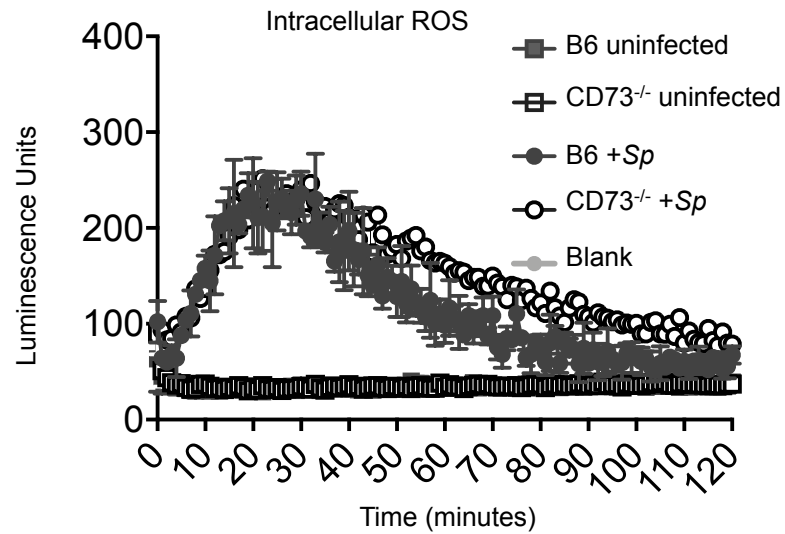

**B.**

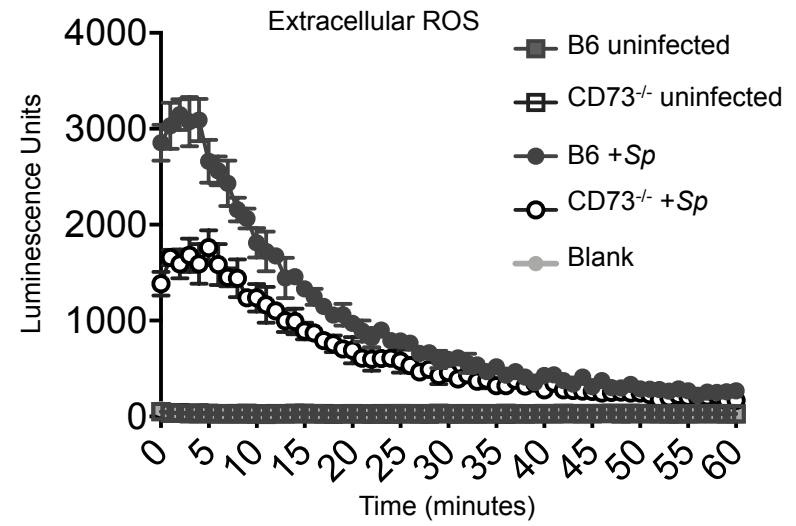

**C.**

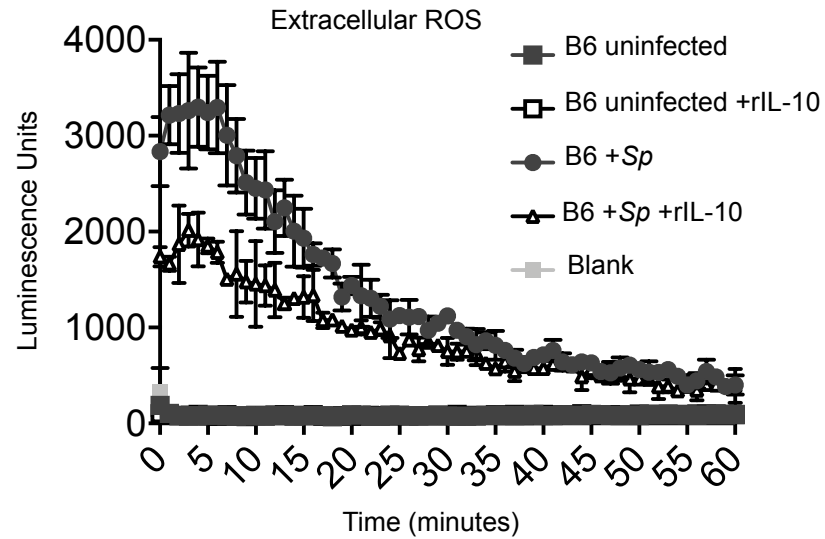

**D.**

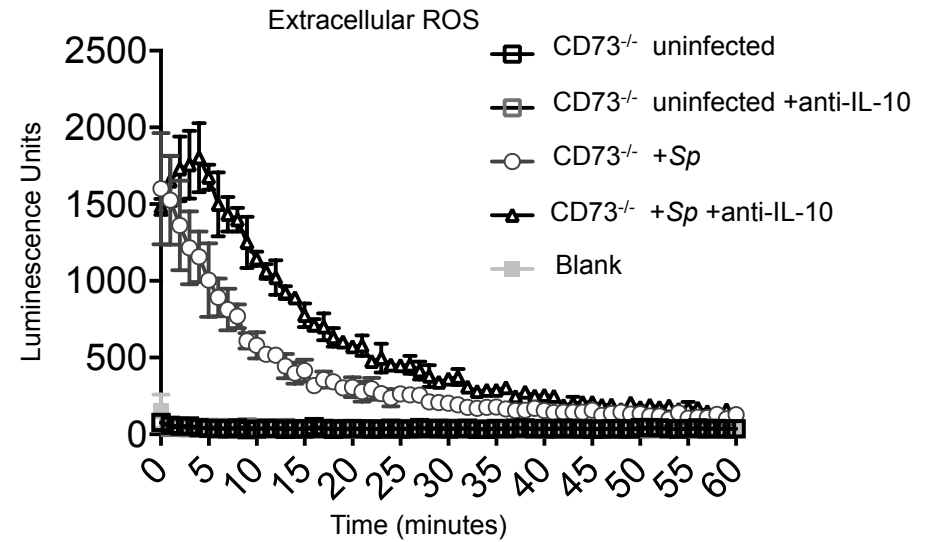

**Figure 8.**

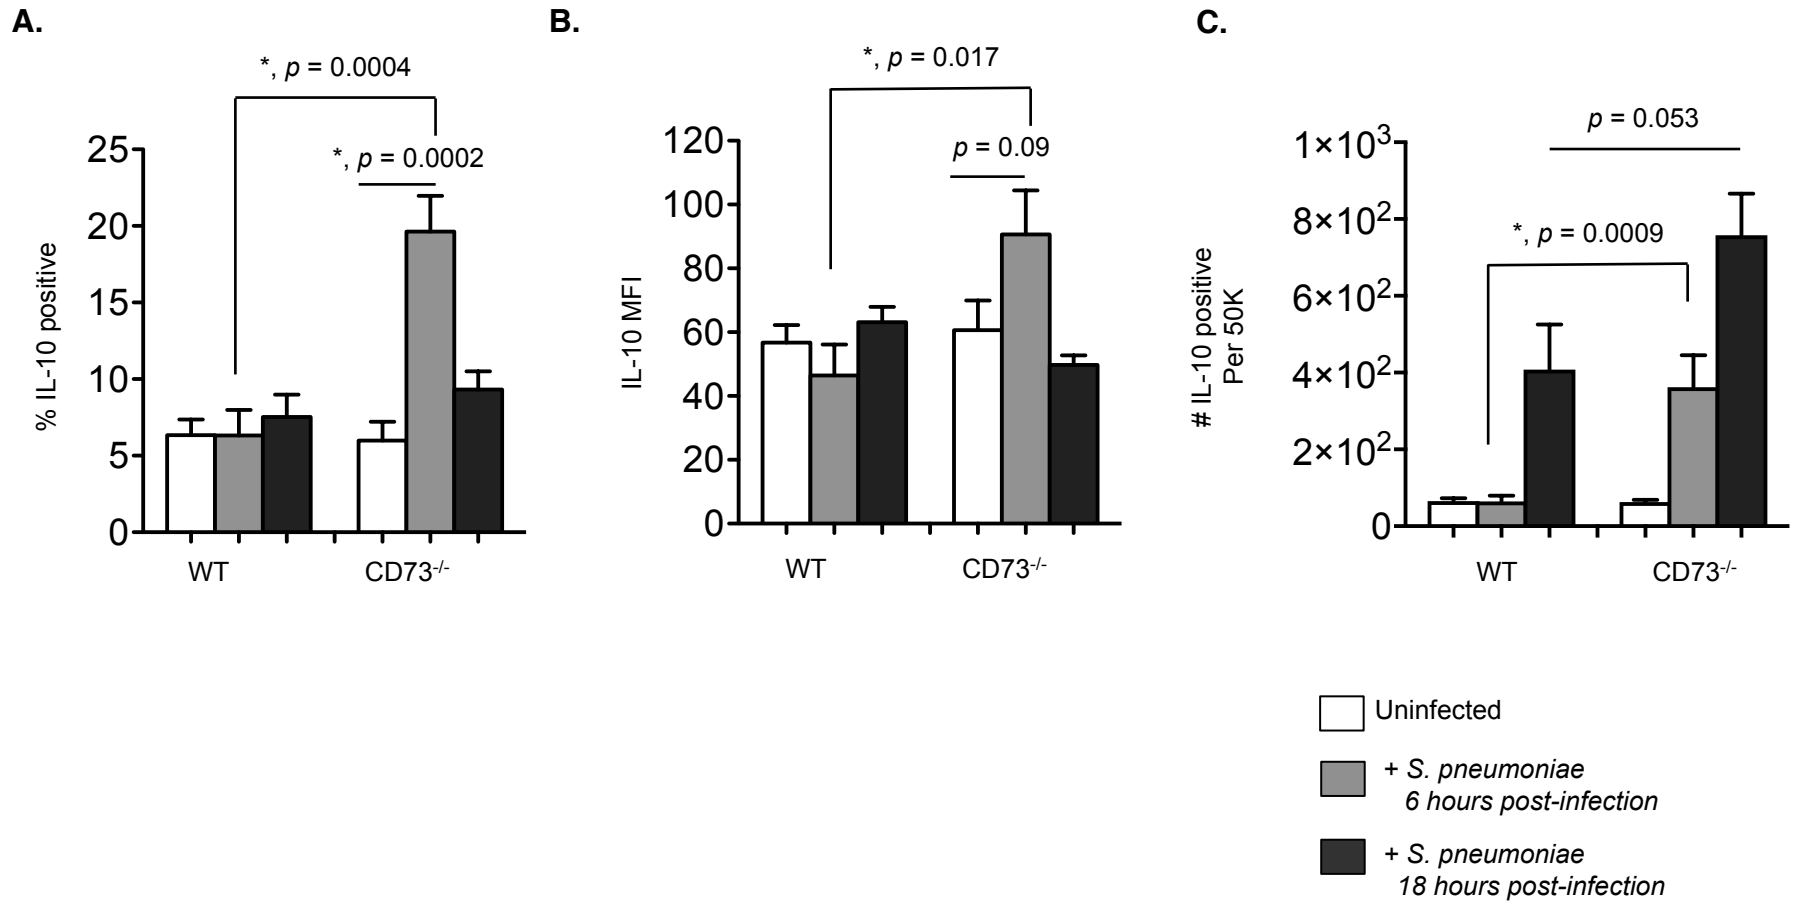

**Figure 9.**

**A.**

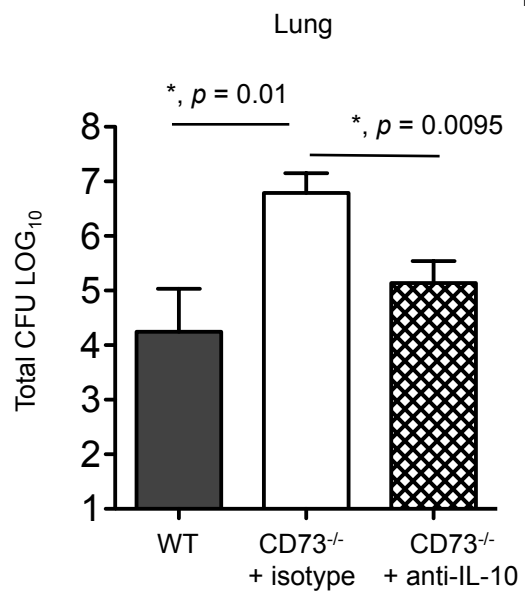

**B.**

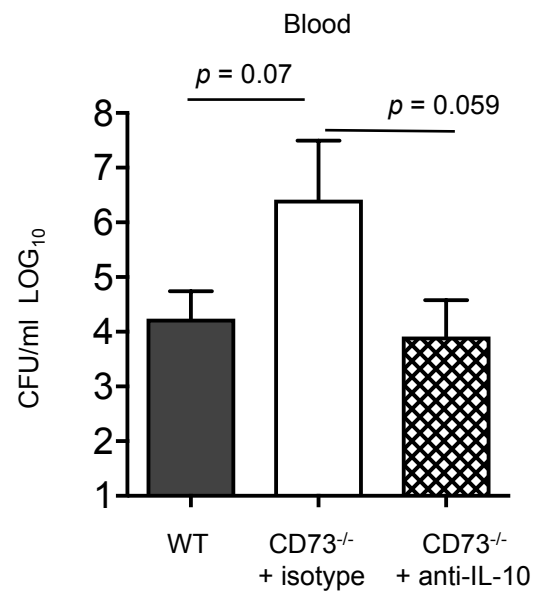

Source: https://www.biorxiv.org/content/10.1101/716456v1.full.pdf
